# Supplementary material
Source: PubMed Central journal article supplement (PMC7502701)
Supplement: pnas.2005981117.sapp.pdf [file pnas.2005981117.sapp.pdf]

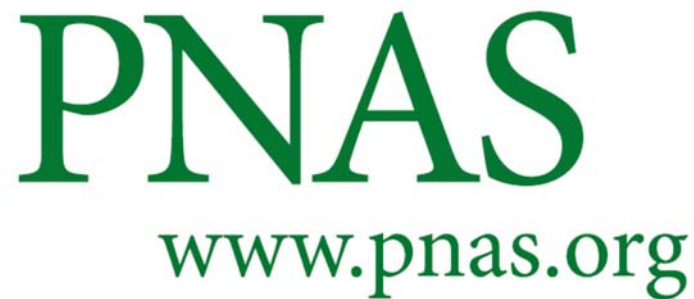

Supplementary Information for

**RubyACRs, non-algal anion channelrhodopsins with highly red-shifted absorption**

Elena G. Govorunova<sup>1</sup>, Oleg A. Sineshchekov<sup>1</sup>, Hai Li<sup>1</sup>, Yumei Wang<sup>1</sup>, Leonid S. Brown<sup>2</sup> and John L. Spudich<sup>1\*</sup>

<sup>1</sup>Center for Membrane Biology, Department of Biochemistry & Molecular Biology, The University of Texas Health Science Center at Houston, McGovern Medical School, Houston, Texas, USA;  
<sup>2</sup>Department of Physics and Biophysics Interdepartmental Group, University of Guelph, Guelph, Ontario, Canada.

\*Address correspondence to: John L. Spudich.

**Email: [John.L.Spudich@uth.tmc.edu](mailto:John.L.Spudich@uth.tmc.edu)**

**This PDF file includes:**

Figures S1 to S11  
Tables S1 to S3  
Legend for Dataset S1

**Other supplementary materials for this manuscript include the following:**

Dataset S1

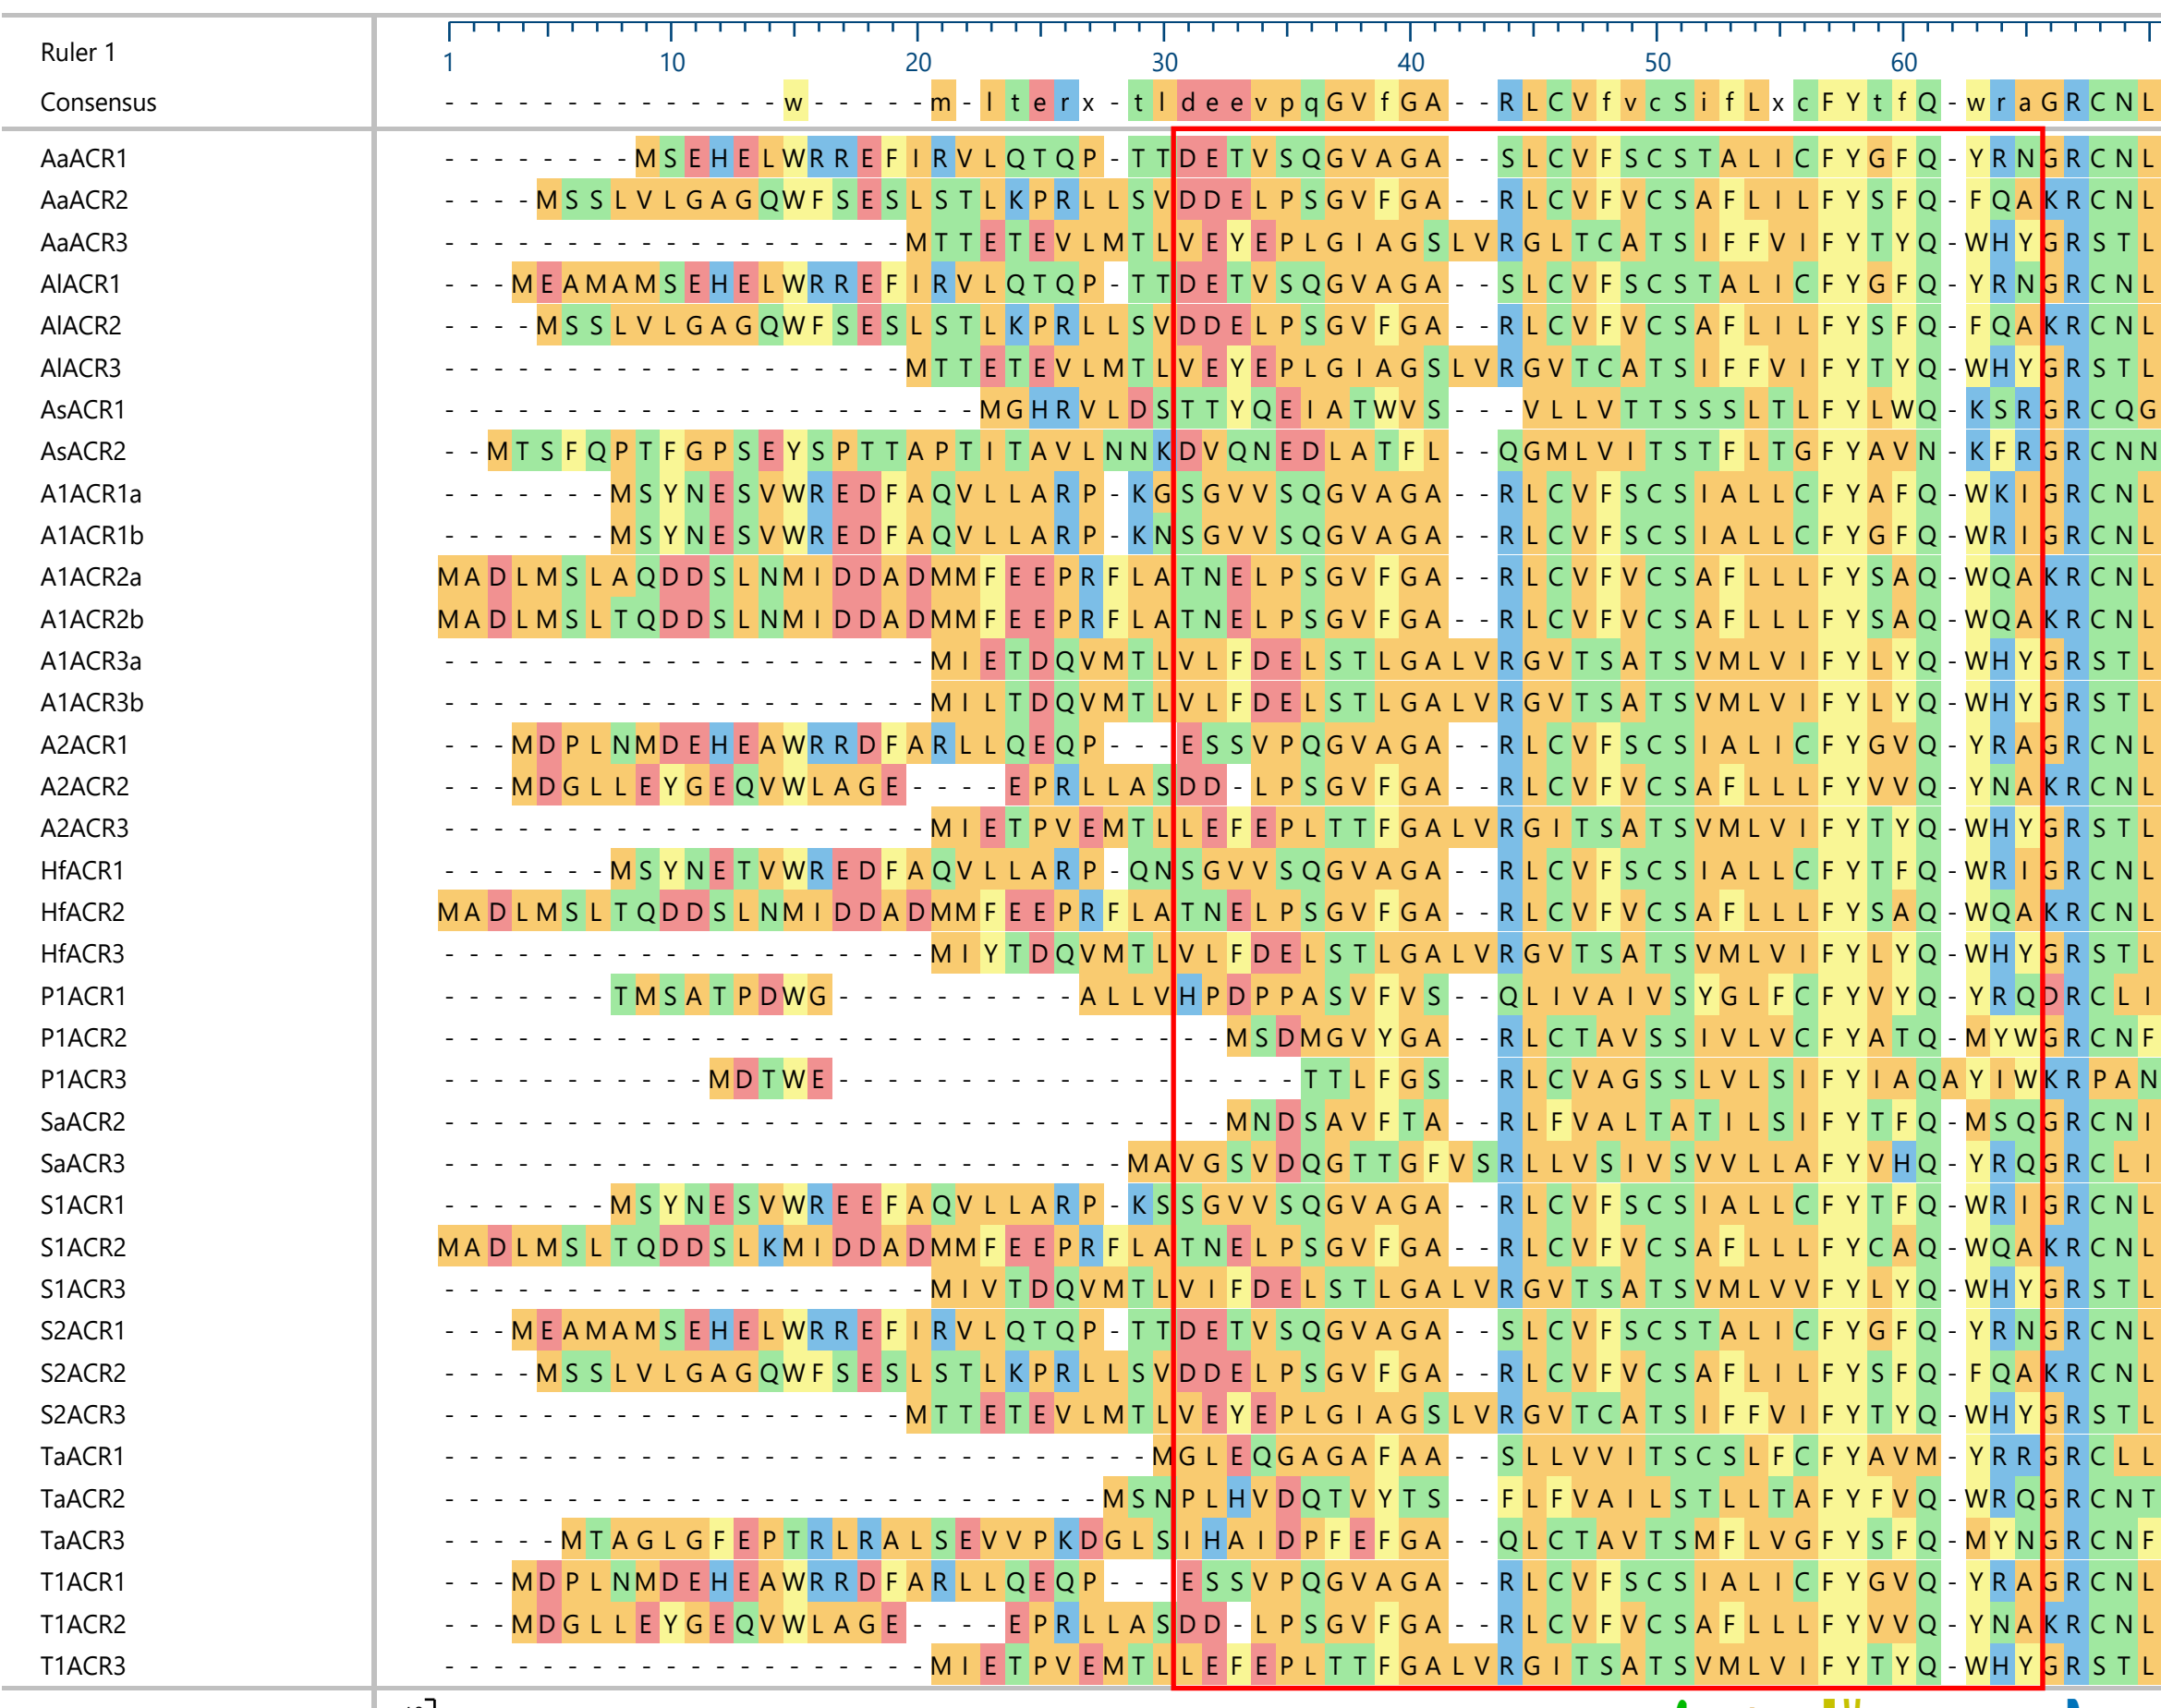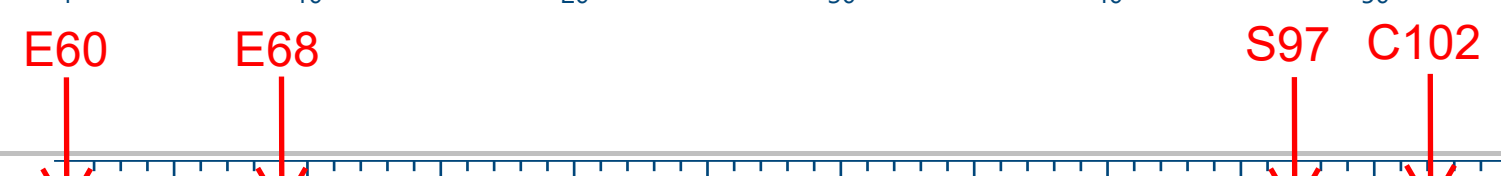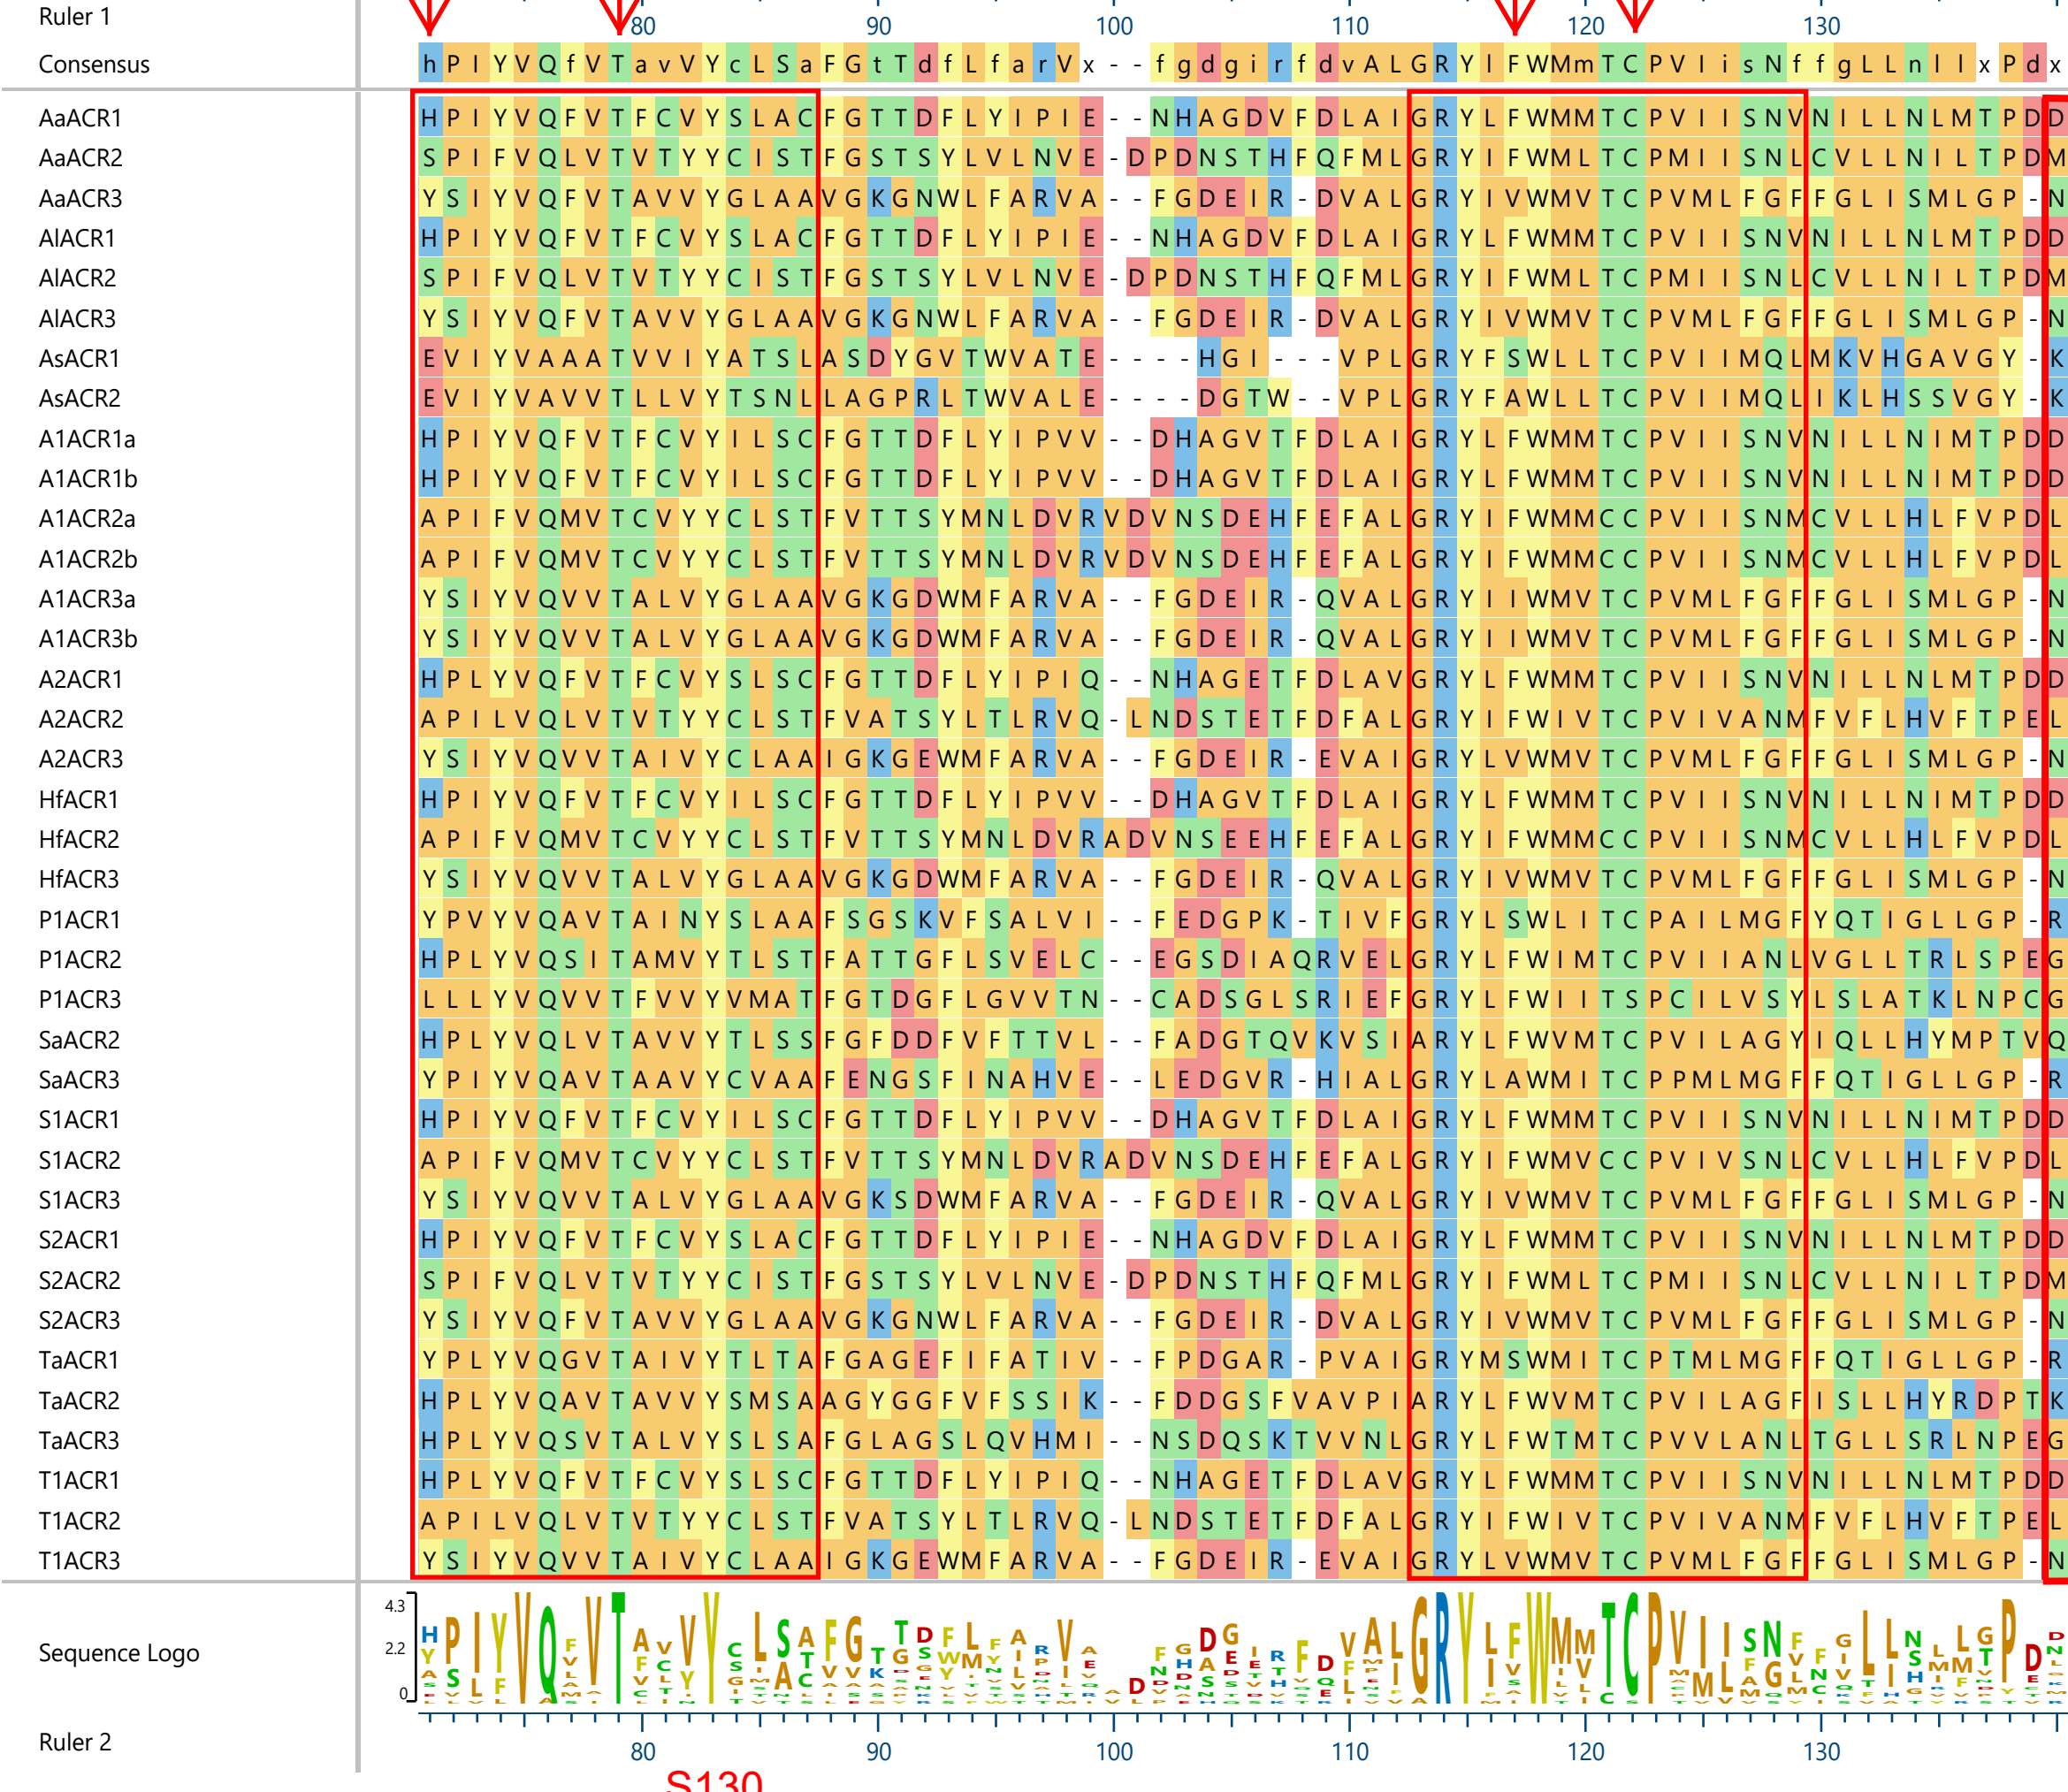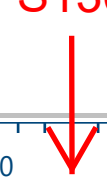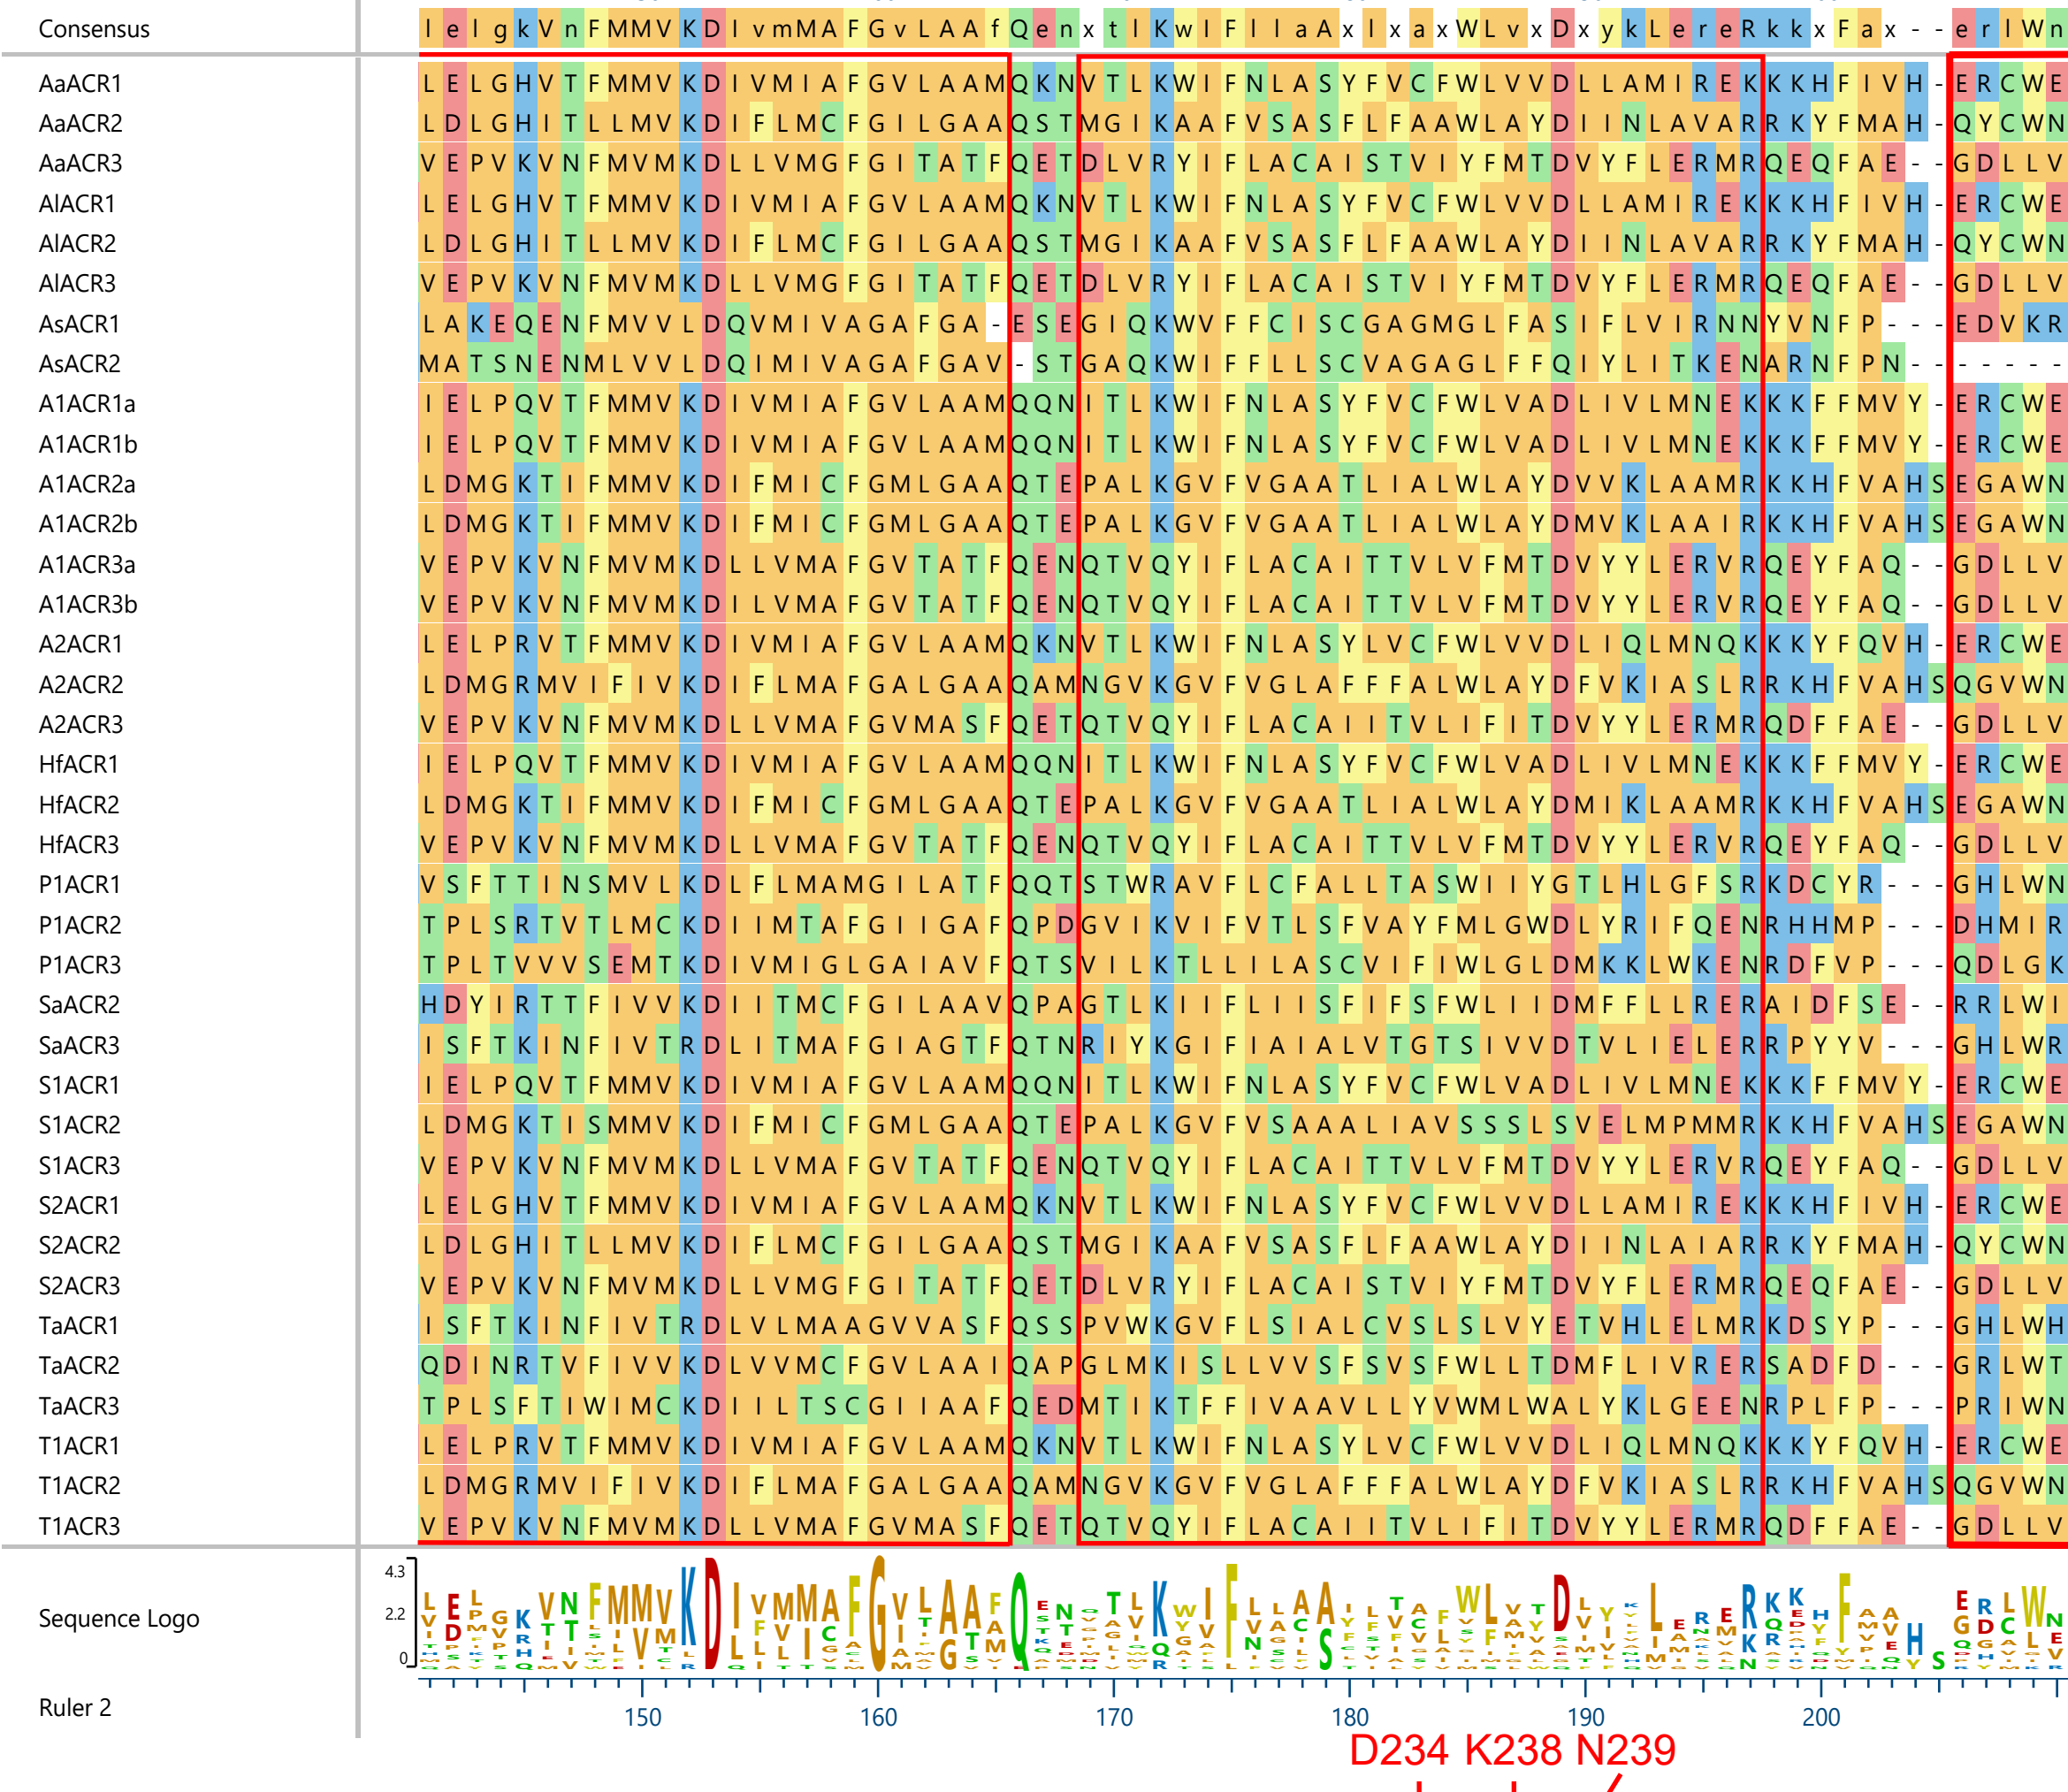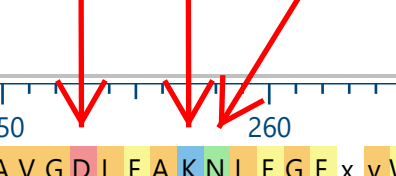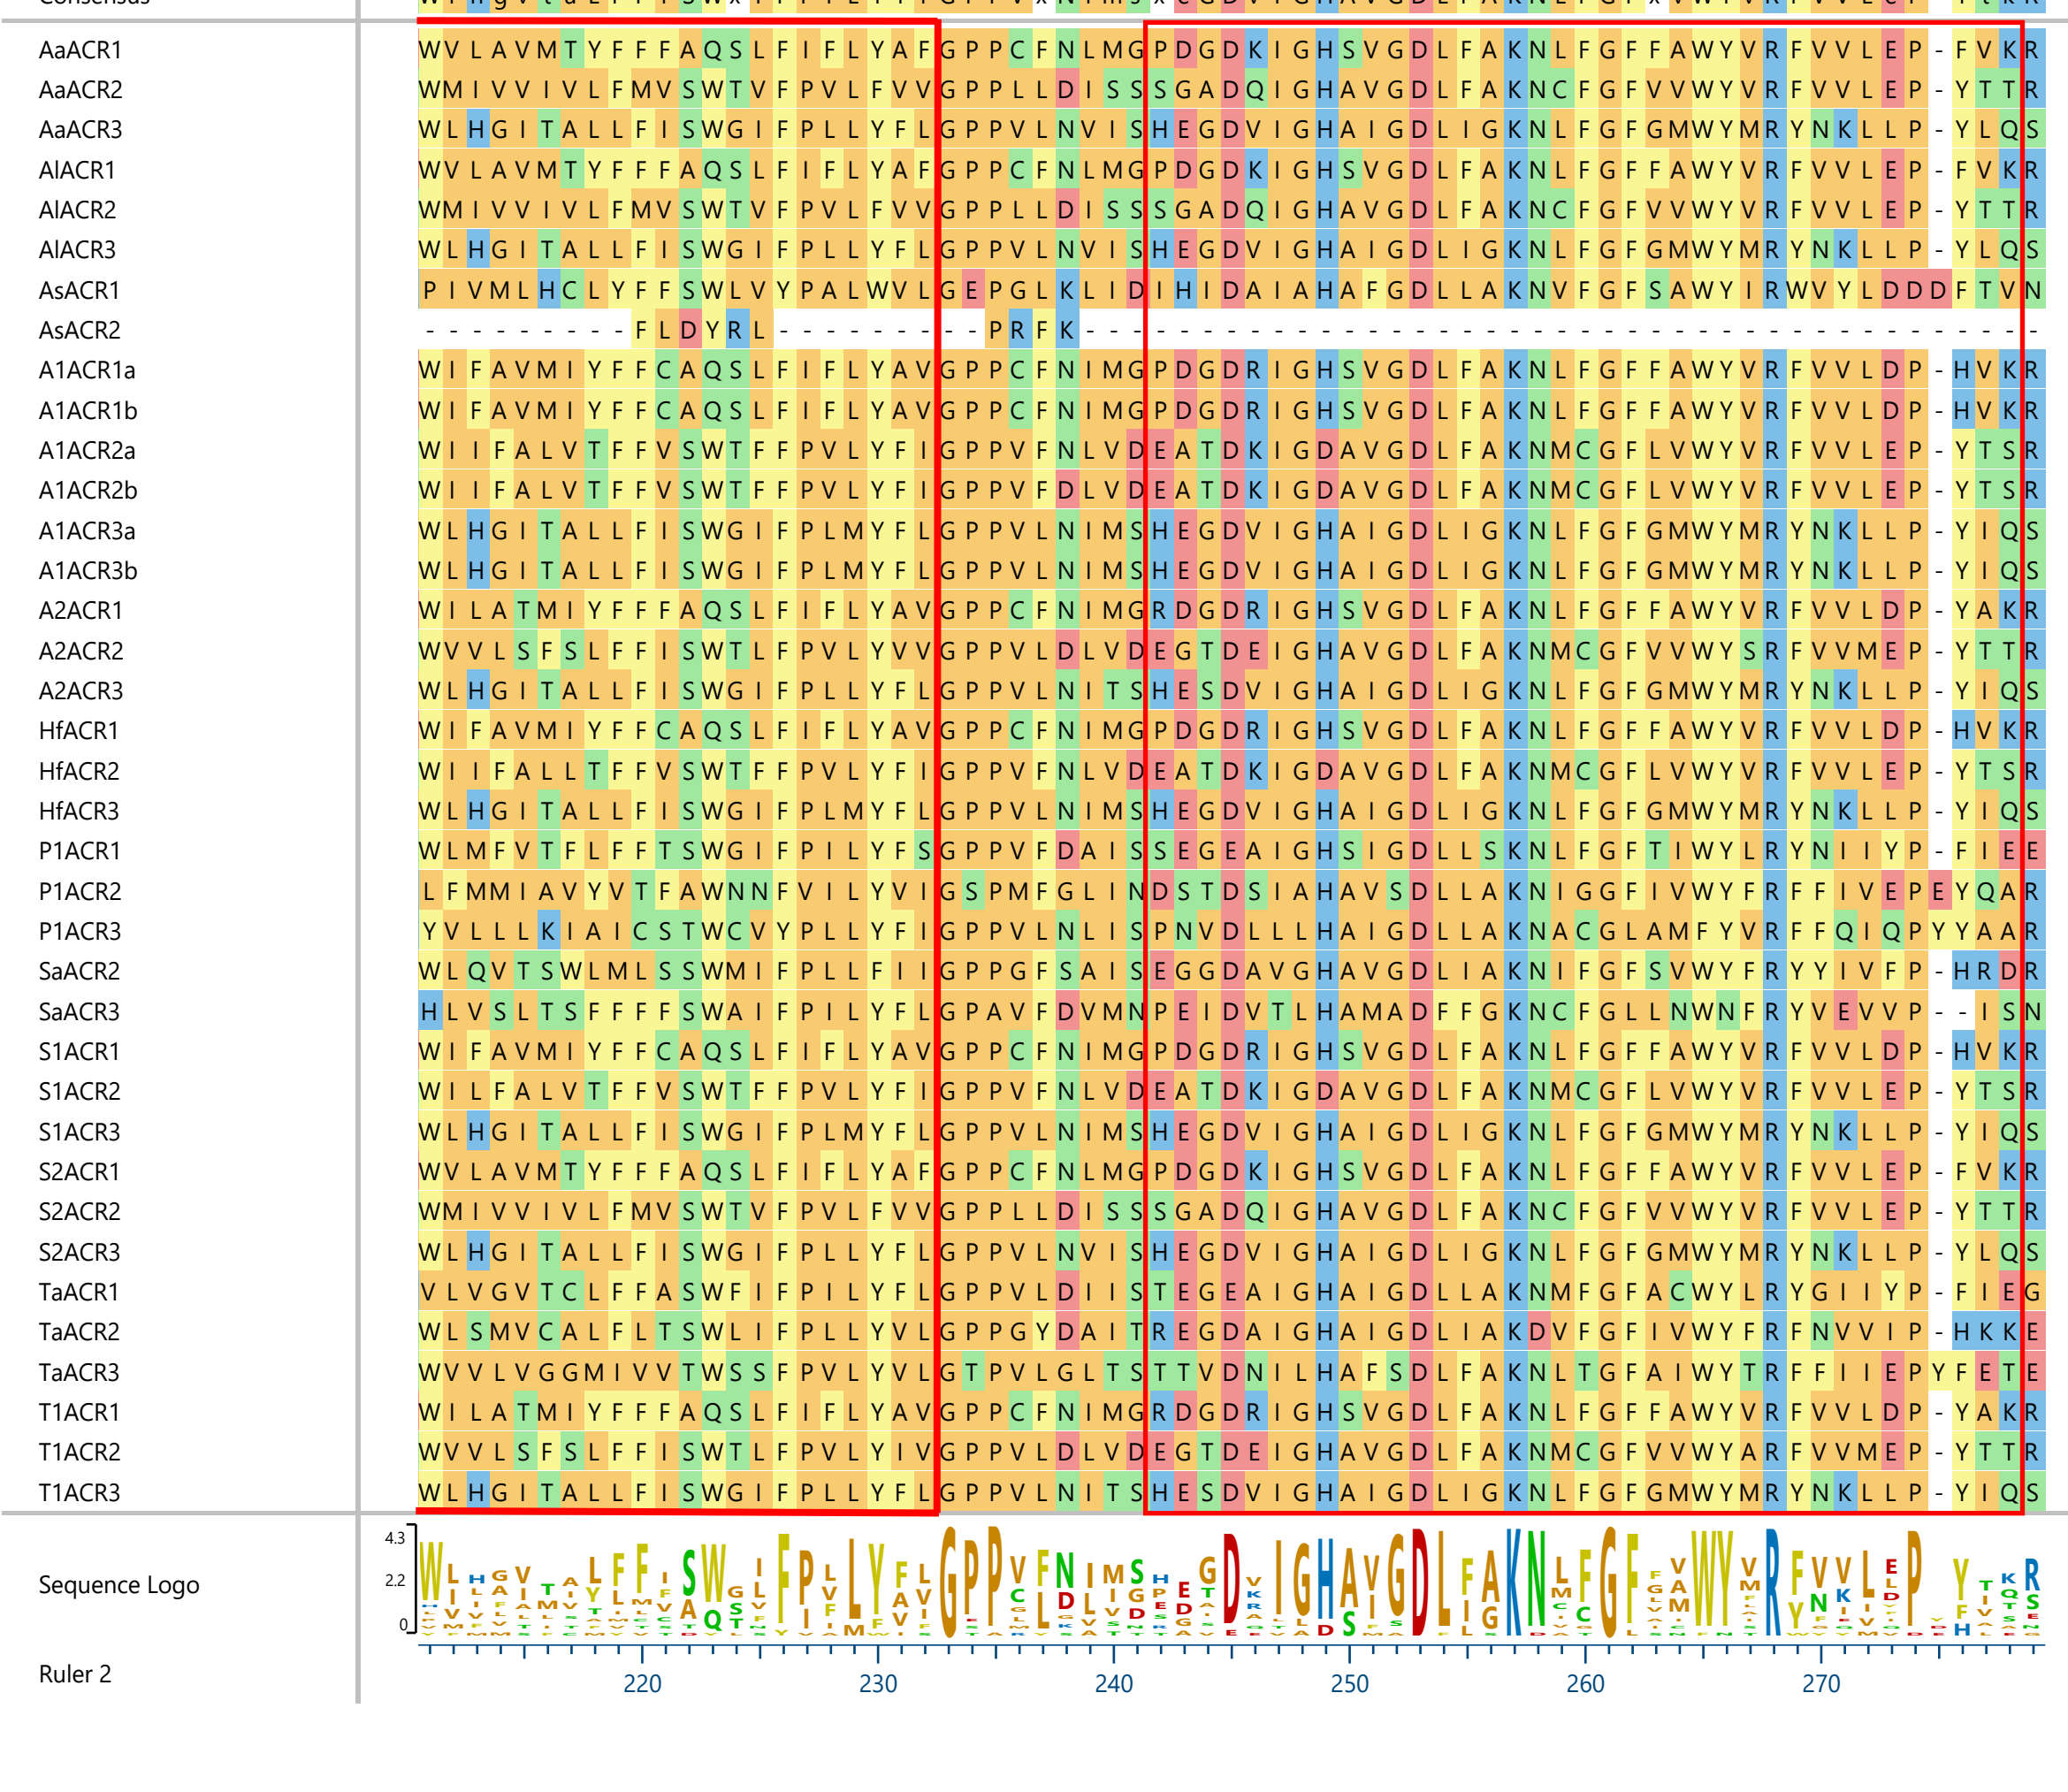

**Fig. S1.** Protein sequence alignment of the rhodopsin domains of labyrinthulea channelrhodopsins. Residues are color-coded according to their chemical properties. The red rectangles show  $\alpha$ -helical regions as detected in the *Ai*ACR1 homology model. The arrows point to the positions of the residues known to be functionally important in *Gt*ACR1 (*Gt*ACR1 numbering).



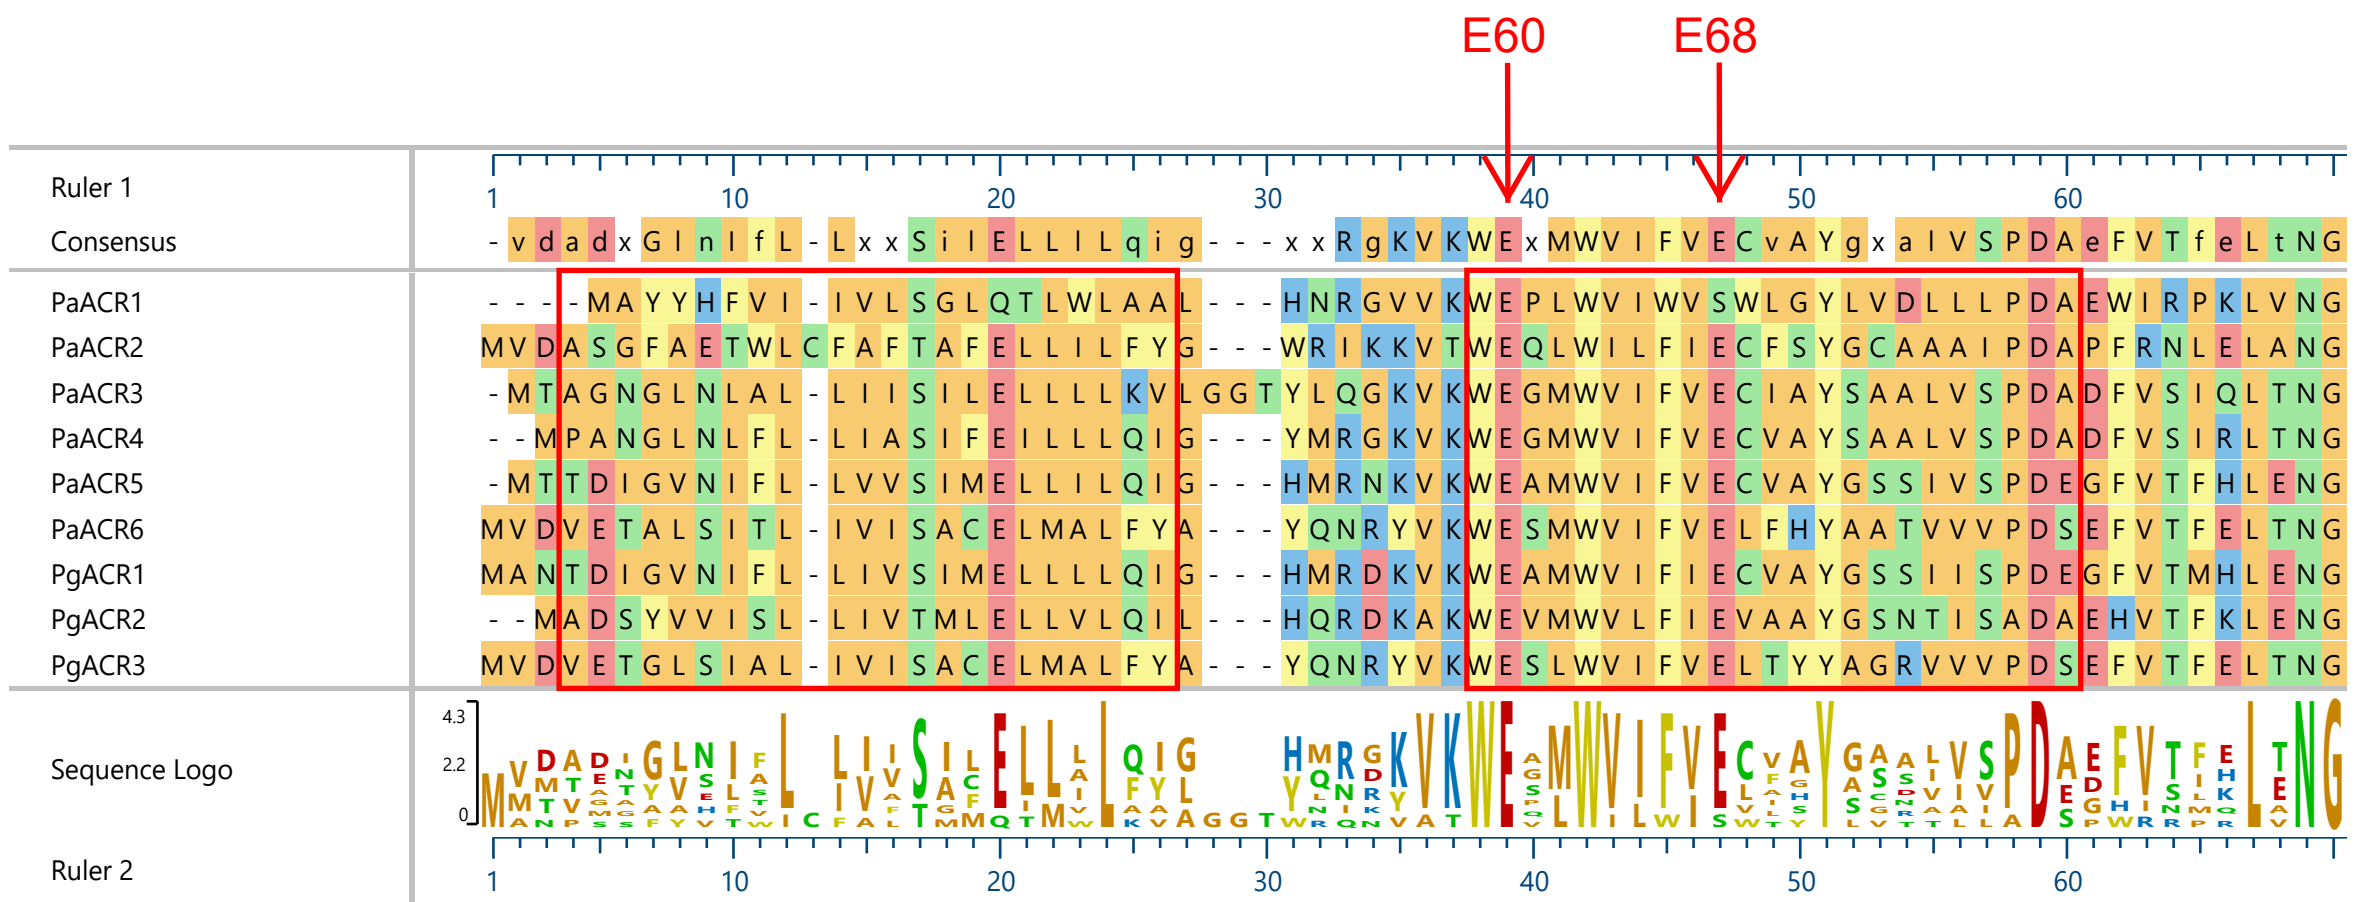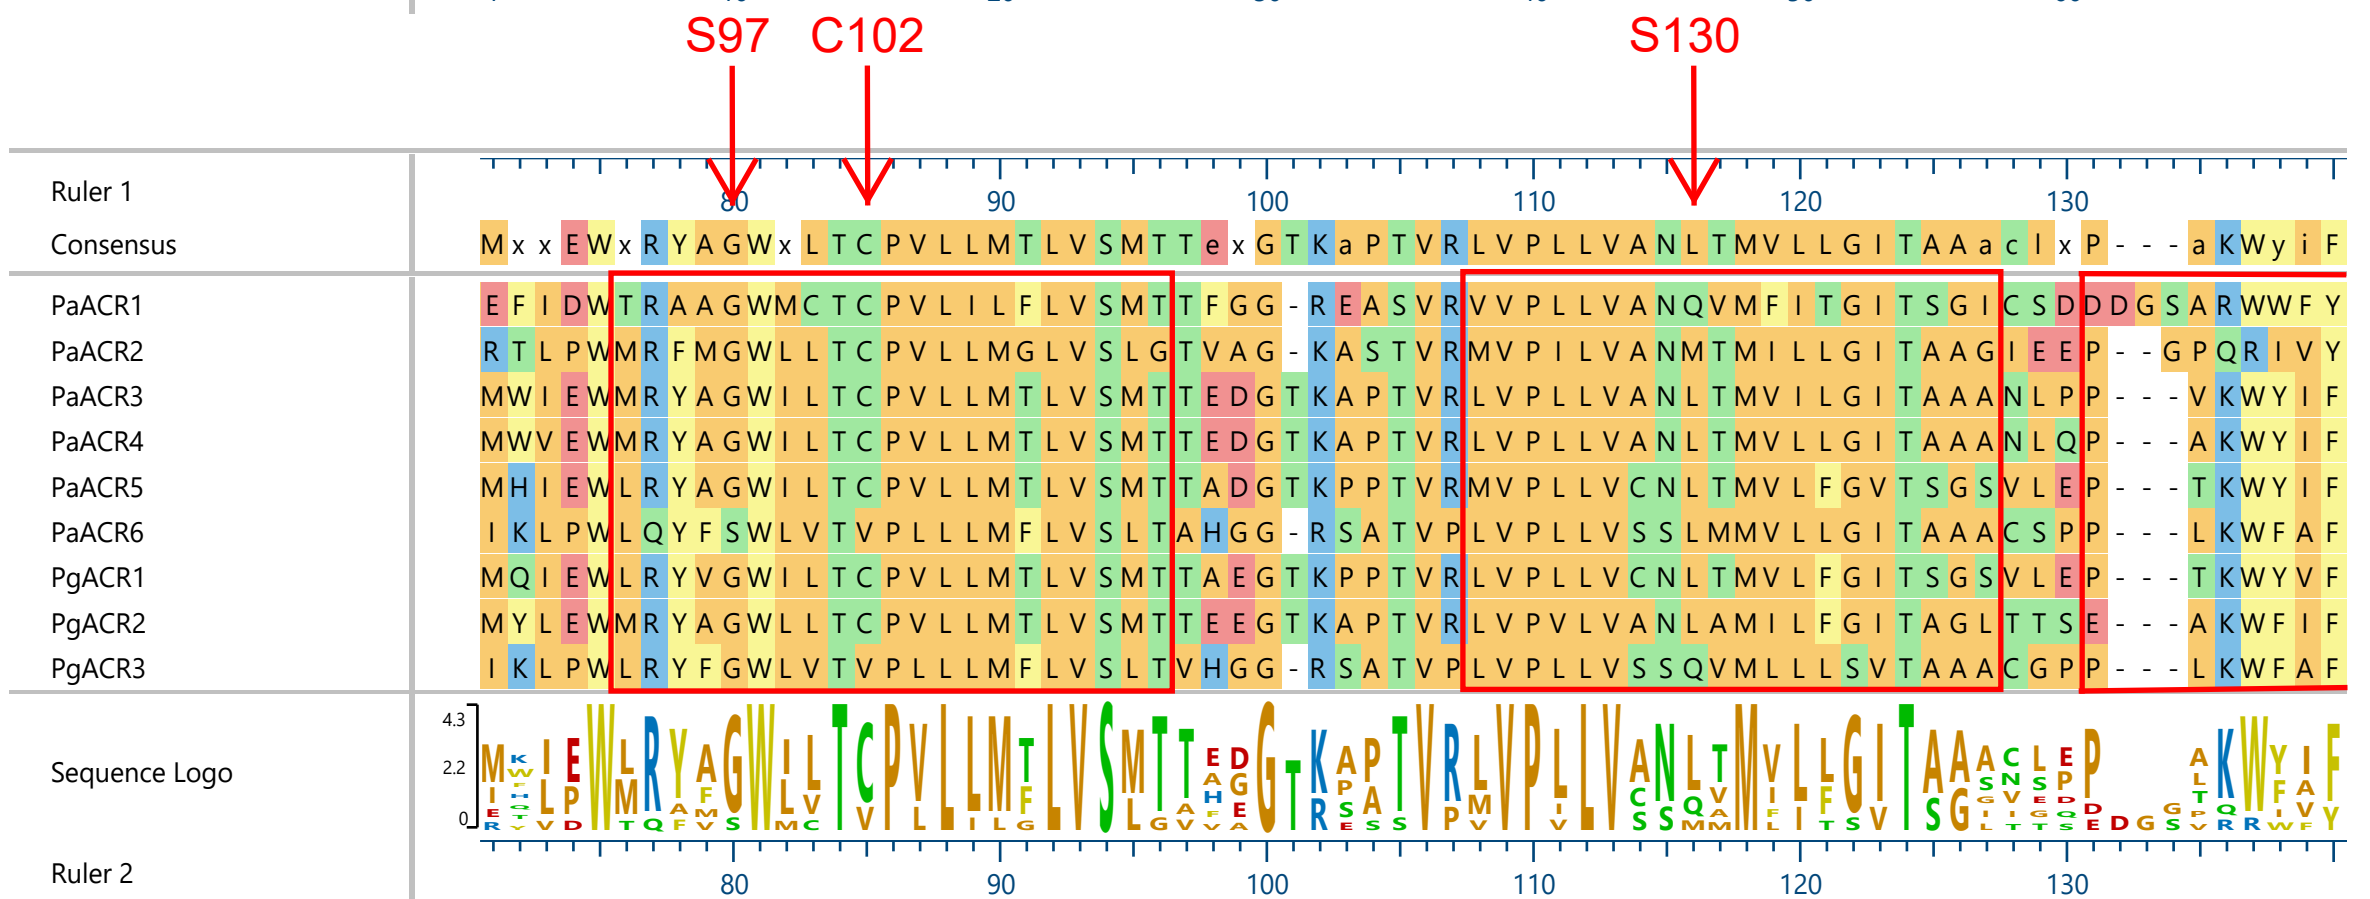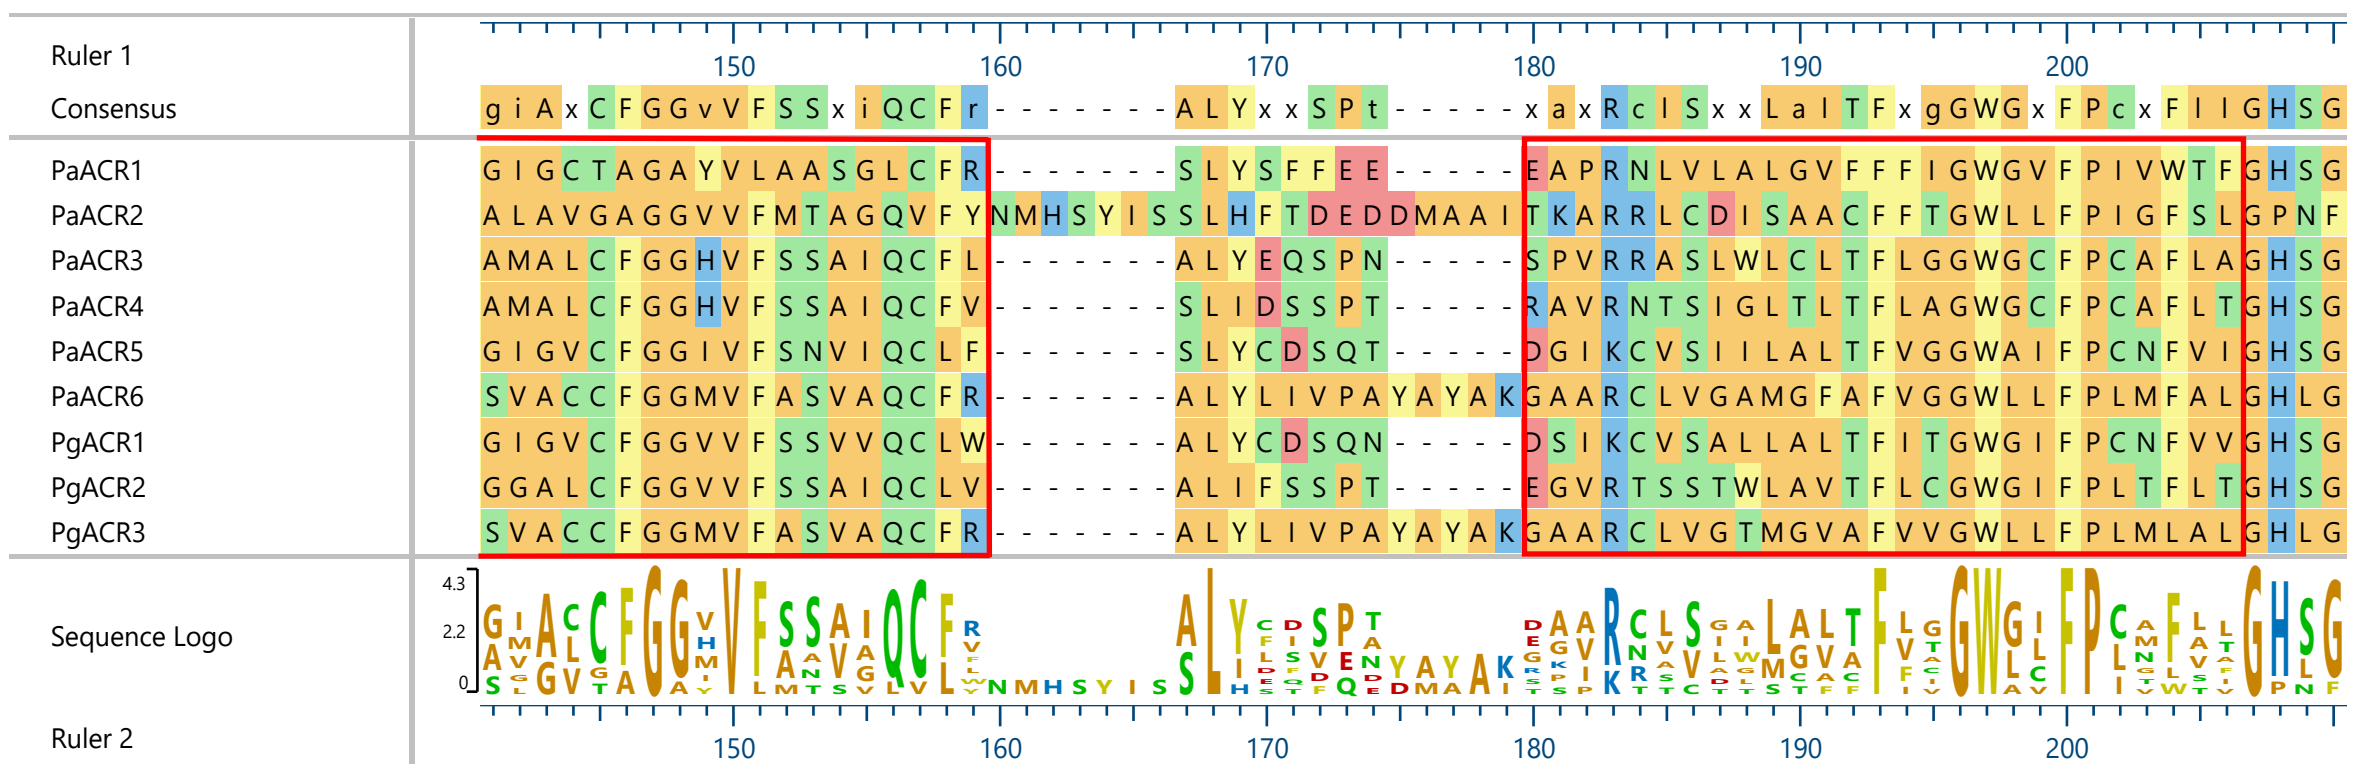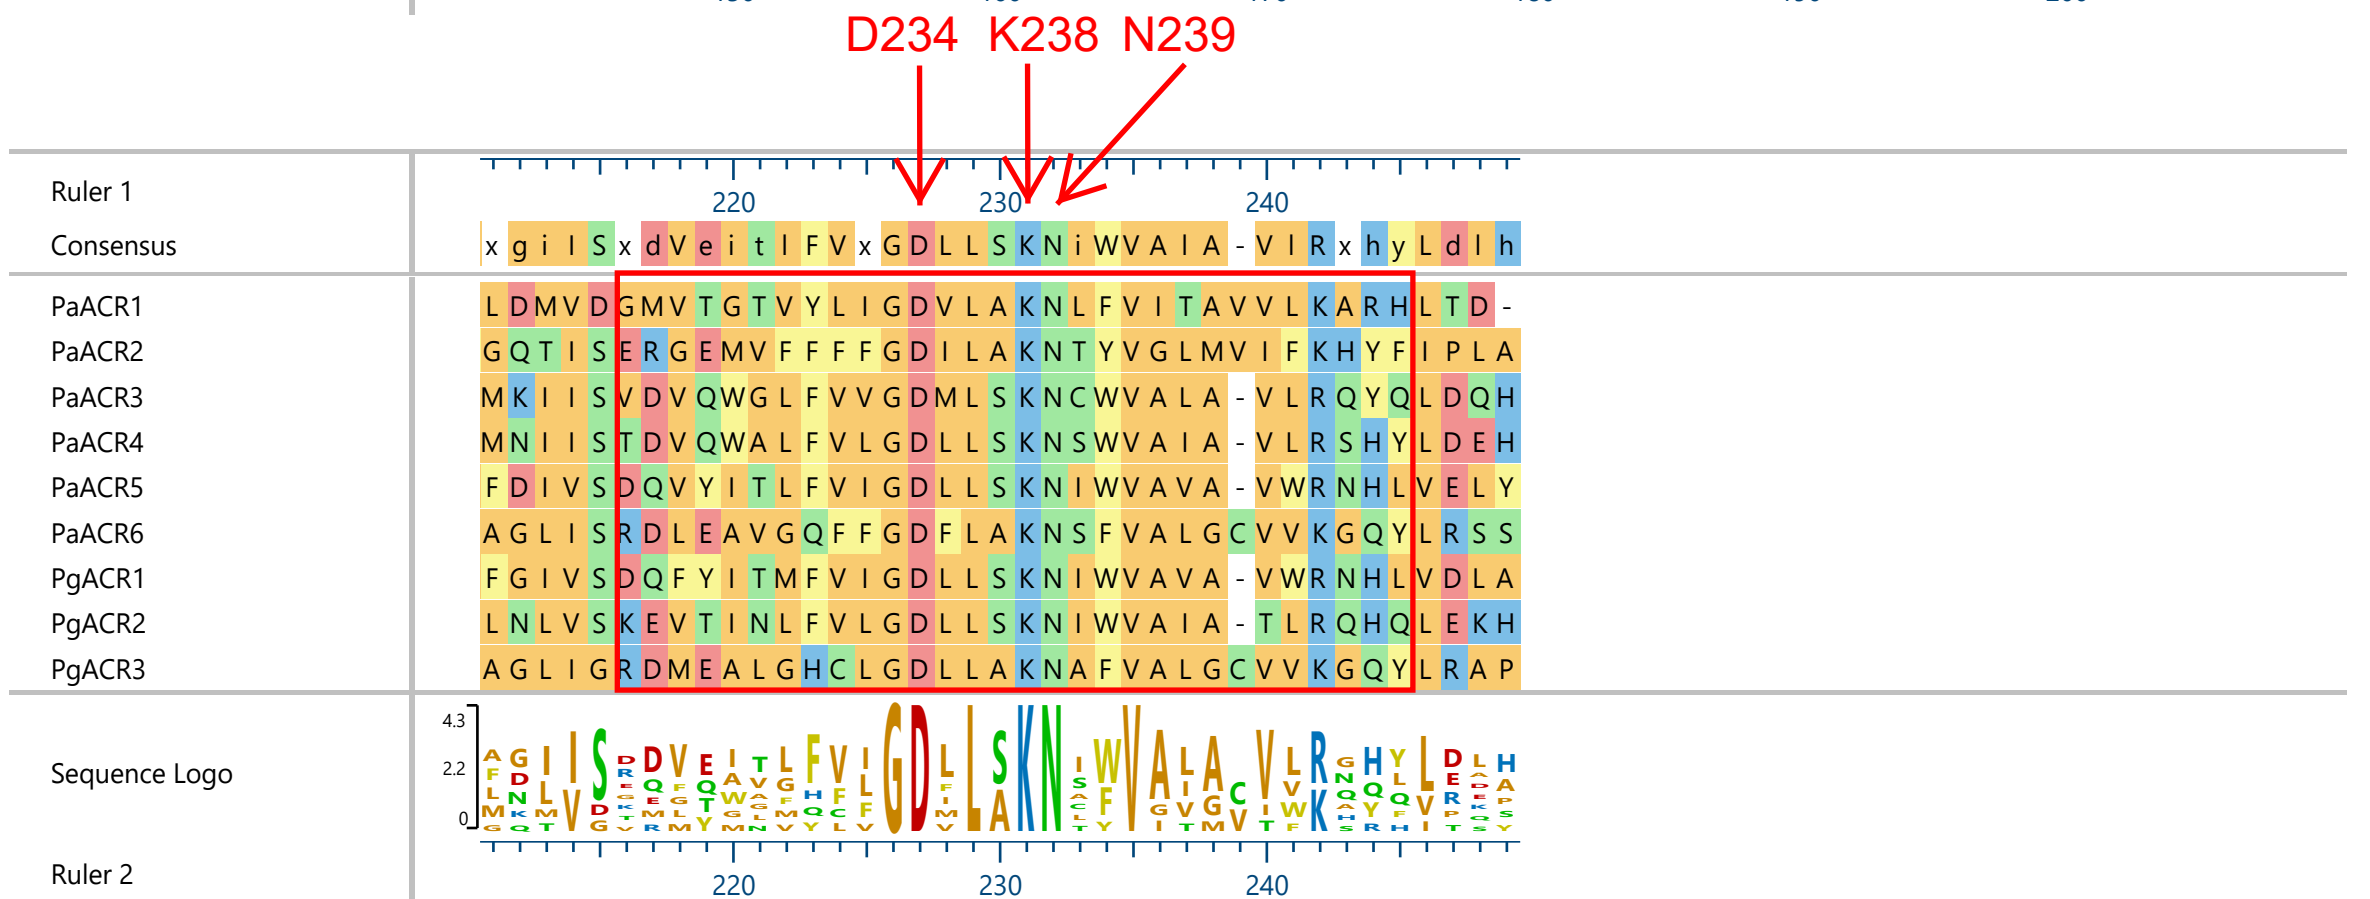

**Fig. S2.** Protein sequence alignment of the rhodopsin domains of haptophyte channelrhodopsins. Residues are color-coded according to their chemical properties. The red rectangles show  $\alpha$ -helical regions as detected in the *Pg*ACR1 homology model. The arrows point to the positions of the residues known to be functionally important in *Gt*ACR1 (*Gt*ACR1 numbering).

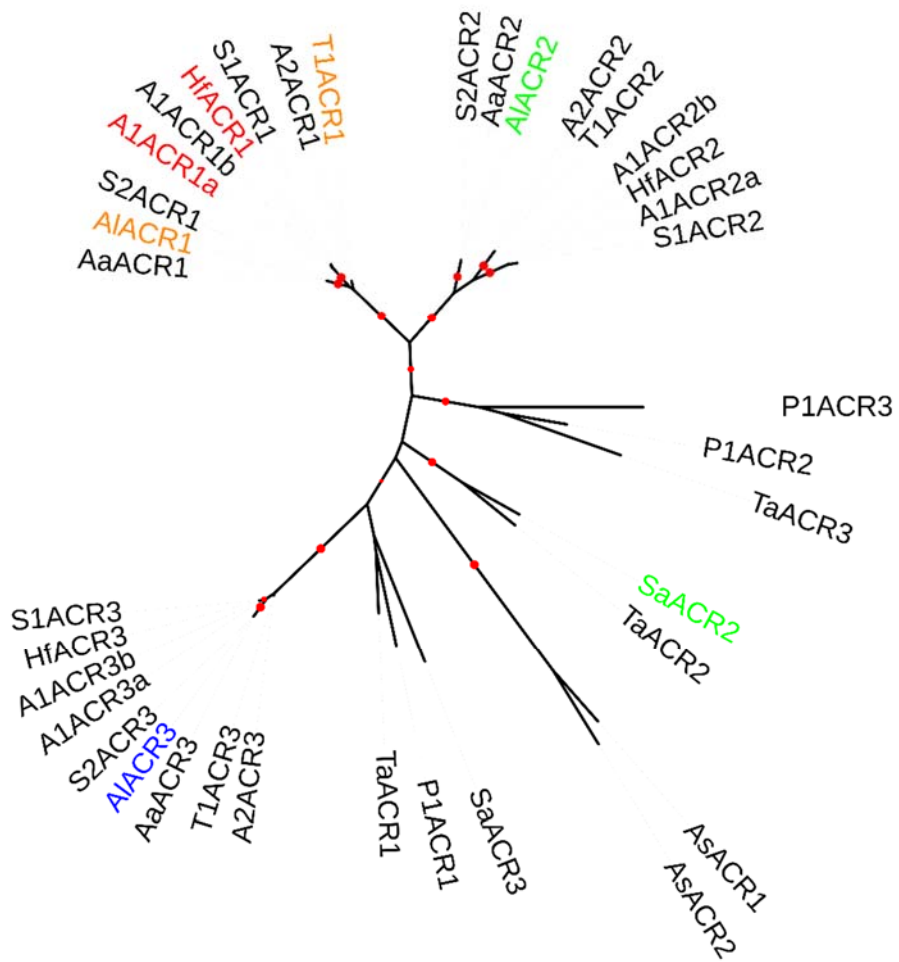

**Fig. S3.** An unrooted phylogenetic tree of labyrinthulea rhodopsin domains. The ultrafast bootstrap support values are shown by red circles (95-100% range). The colored leaf labels show proteins tested in this study; the color of the label corresponds to the wavelength of the maximal sensitivity.

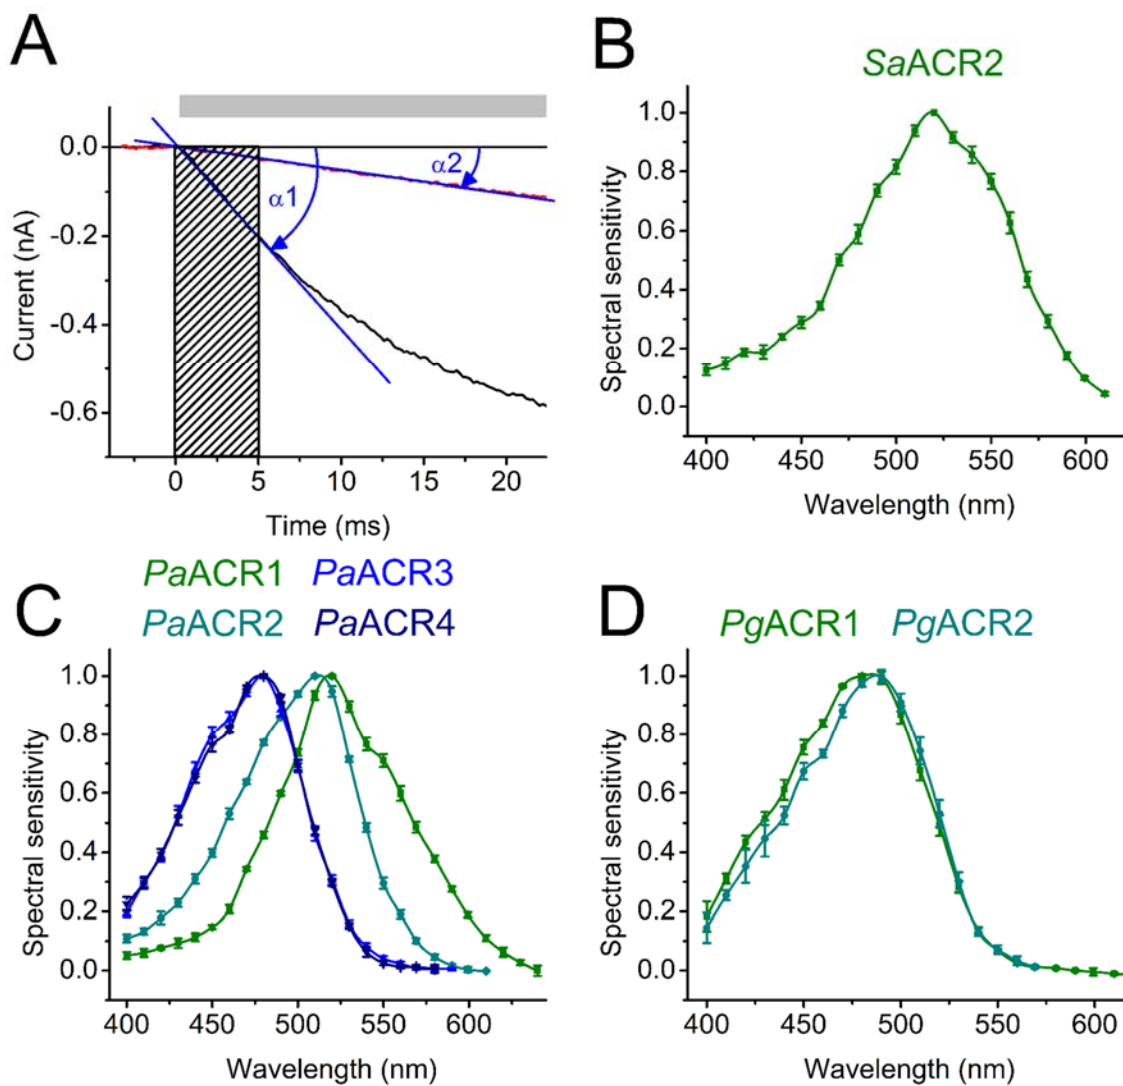

**Fig. S4.** (A) An example of photocurrent traces generated by *SaACR2* at two different wavelengths (black lines), linear approximation of their initial segments (blue lines) and slopes ( $\alpha_1$  and  $\alpha_2$ ) used for construction of the action spectra. The hatched region shows the segments of the traces used for linear approximation. (B-D) The action spectra of the indicated homologs, constructed as shown in panel A. The data points are the mean values  $\pm$  sem ( $n = 6-8$  scans).

|        |        |        |        |        |        |       |        |         |       |        |        |       |      |      |     |      |     |     |    |      |     |
|--------|--------|--------|--------|--------|--------|-------|--------|---------|-------|--------|--------|-------|------|------|-----|------|-----|-----|----|------|-----|
|        | 10     | 20     | 30     | 40     | 50     | 60    | 70     |         |       |        |        |       |      |      |     |      |     |     |    |      |     |
| HfACR1 | MSYNE  | VWREDF | QVLLAR | PQNS   | SGVVSQ | GVARL | CVFSCS | IALLCFY | IFQWR | IGRCNL | HPIYVQ | FVTFC | 70   |      |     |      |     |     |    |      |     |
| A1ACR1 | MSYNES | VWREDF | QVLLAR | PQNS   | SGVVSQ | GVARL | CVFSCS | IALLCFY | AFQWK | IGRCNL | HPIYVQ | FVTFC | 70   |      |     |      |     |     |    |      |     |
|        |        |        |        |        |        |       |        |         |       |        |        |       |      |      |     |      |     |     |    |      |     |
|        | 80     | 90     | 100    | 110    | 120    | 130   | 140    |         |       |        |        |       |      |      |     |      |     |     |    |      |     |
| HfACR1 | VYILSC | FGTTF  | FLYIP  | VVDHAG | VTFDLA | IGRYL | FWM    | MTC     | CPVI  | ISNVN  | ILLN   | IMTP  | DDI  | ELPQ | VTF | FMMV | KD  | 140 |    |      |     |
| A1ACR1 | VYILSC | FGTTF  | FLYIP  | VVDHAG | VTFDLA | IGRYL | FWM    | MTC     | CPVI  | ISNVN  | ILLN   | IMTP  | DDI  | ELPQ | VTF | FMMV | KD  | 140 |    |      |     |
|        |        |        |        |        |        |       |        |         |       |        |        |       |      |      |     |      |     |     |    |      |     |
|        | 150    | 160    | 170    | 180    | 190    | 200   | 210    |         |       |        |        |       |      |      |     |      |     |     |    |      |     |
| HfACR1 | IVMIA  | FGVLA  | AMQ    | QNITL  | KWIF   | NLAS  | YFV    | CFWL    | VADL  | IVLM   | NEK    | KKK   | FFM  | VYER | CWE | WIF  | FAV | MIY | FF | CAQS | 210 |
| A1ACR1 | IVMIA  | FGVLA  | AMQ    | QNITL  | KWIF   | NLAS  | YFV    | CFWL    | VADL  | IVLM   | NEK    | KKK   | FFM  | VYER | CWE | WIF  | FAV | MIY | FF | CAQS | 210 |
|        |        |        |        |        |        |       |        |         |       |        |        |       |      |      |     |      |     |     |    |      |     |
|        | 220    | 230    | 240    | 250    | 260    | 270   |        |         |       |        |        |       |      |      |     |      |     |     |    |      |     |
| HfACR1 | LFIFLY | AVGPP  | CFNIM  | GPDG   | DRIGH  | SVGDL | FAKNL  | EGFF    | AWYV  | RFV    | VLD    | PHV   | KRIR | GARA | 270 |      |     |     |    |      |     |
| A1ACR1 | LFIFLY | AVGPP  | CFNIM  | GPDG   | DRIGH  | SVGDL | FAKNL  | EGFF    | AWYV  | RFV    | VLD    | PHV   | KRIR | GARA | 270 |      |     |     |    |      |     |

**Fig. S5.** An alignment of A1ACR1 and HfACR1 rhodopsin domains. Identical residues are shaded black.



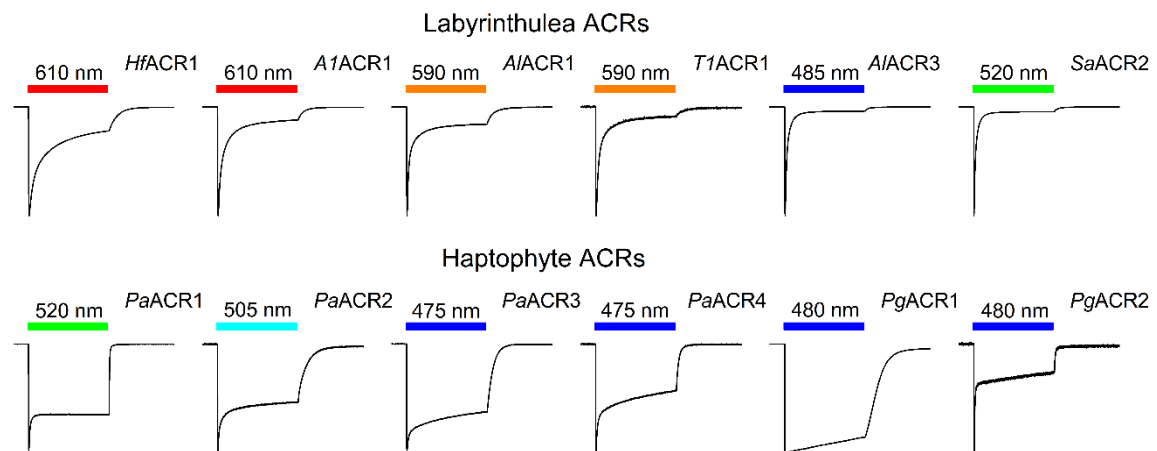

**Fig. S6.** Photocurrent traces recorded in response to the first 1-s light pulse at -60 mV at the amplifier output, normalized at their peak value. The duration of illumination is showed as a colored bar on top.

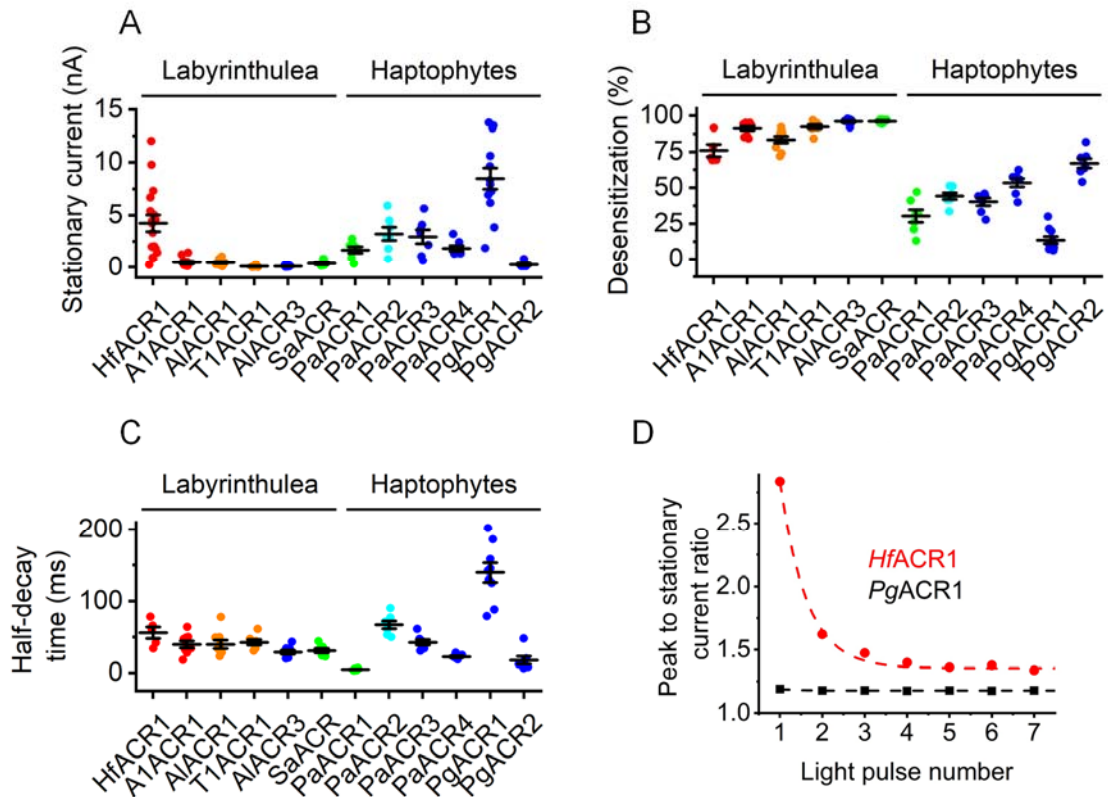

**Fig. S7.** (A) Stationary current measured at the end of a 1-s light pulse. (B) The magnitude of desensitization during 1-s continuous illumination. (C) Half-decay of photocurrent after switching the light off. In A-C, the black lines show the mean values and s.e.m. ( $n = 5-10$  cells for each variant); colored circles, the individual data points. (D) The ratio of the peak amplitude to that of the stationary current measured in a series of 1-s pulses applied with 30-s time interval. The lines are single exponential fits.

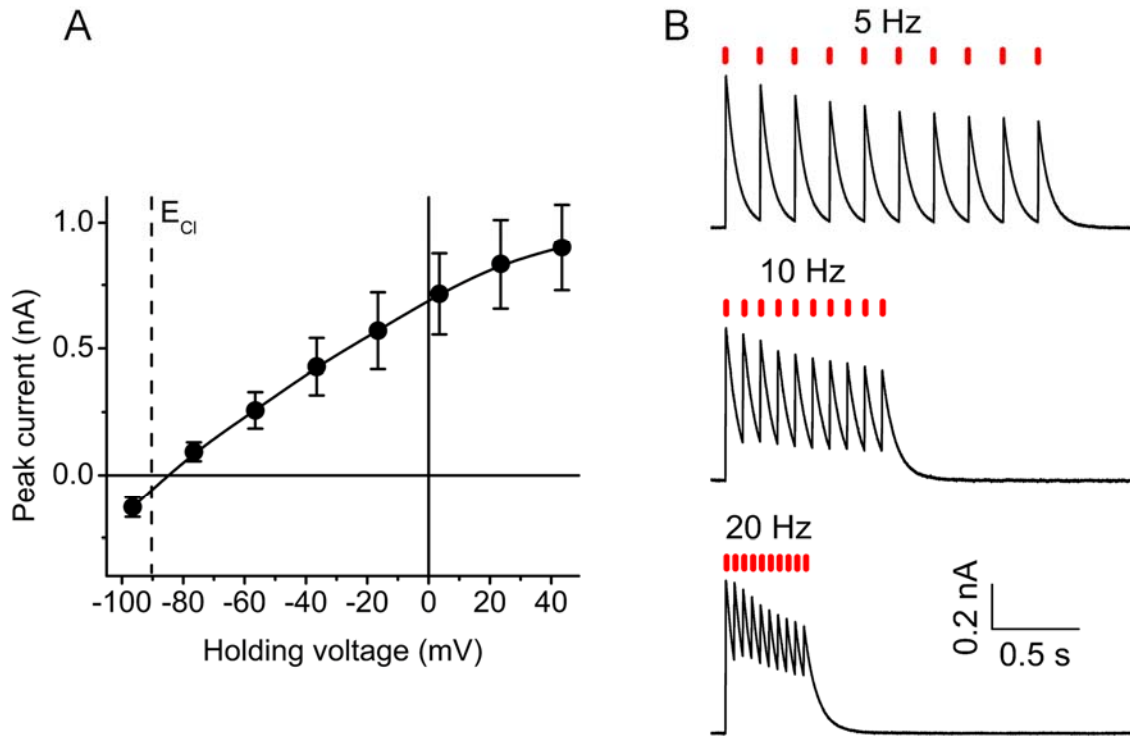

**Fig. S8.** Performance of *HfACR1* activated at 630 nm ( $5.6 \text{ mW}\cdot\text{cm}^{-2}$ ) and tested under ionic conditions typical of mature neurons (for solution compositions see Methods). (A) A current-voltage relationship. The data points are the mean  $\pm$  sem ( $n = 5$  cells). (B) Photocurrent traces recorded from *HfACR1* upon repetitive stimulation with 2-ms light pulses at  $-20 \text{ mV}$  at the amplifier output.

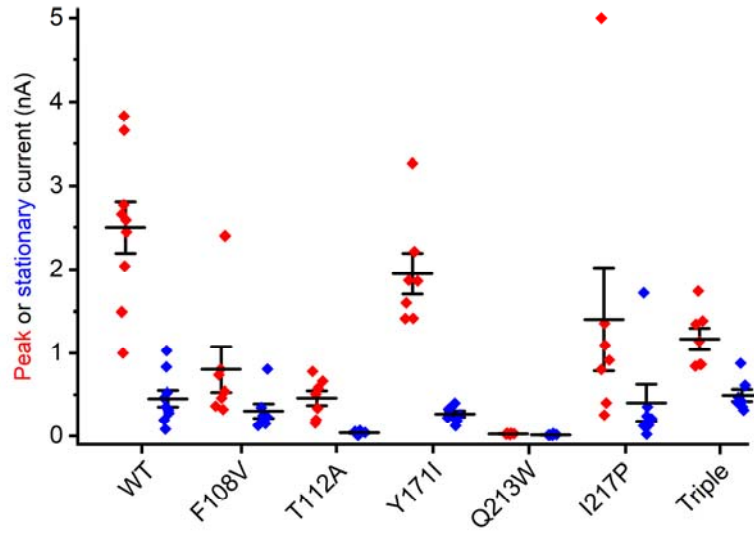

**Fig. S9.** Peak (red) and stationary (blue) photocurrents recorded from color-tuning mutations of *A/ACR1*. The mean  $\pm$  sem are shown as lines and whiskers ( $n = 7$ ), data from individual cells, as diamonds. The data for wild type (WT) are taken from Fig. 1C. Triple, the F108V\_Y171I\_I217P mutant.



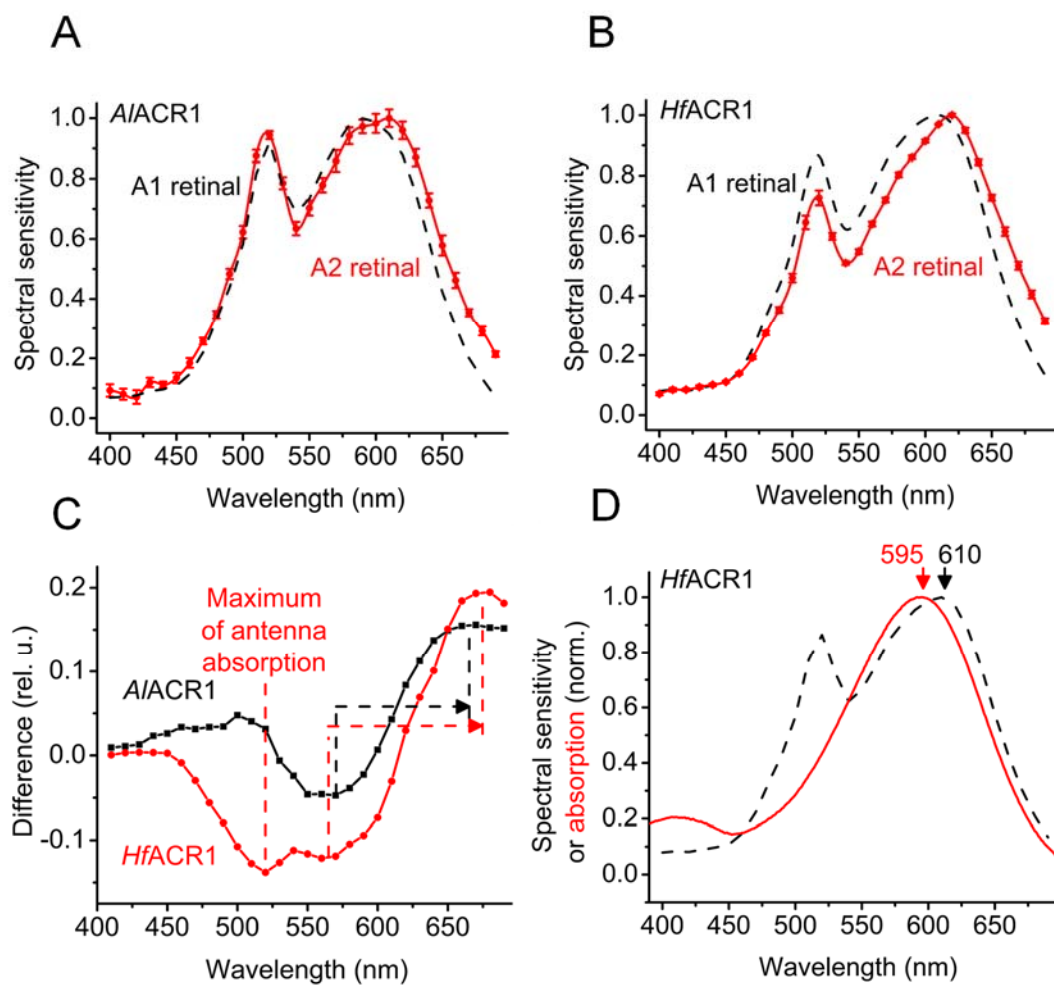

**Fig. S10.** (A and B) The action spectra of photocurrents generated by indicated proteins reconstituted with A1 (black) and A2 (red) retinal. (C) The difference spectra (A2-A1 retinal). (D) The absorption spectrum of *HfACR1* detergent-purified from *Pichia* (red solid line) compared to the action spectrum of photocurrents generated upon its expression in HEK293 cells from Fig. 1B (black dashed line).

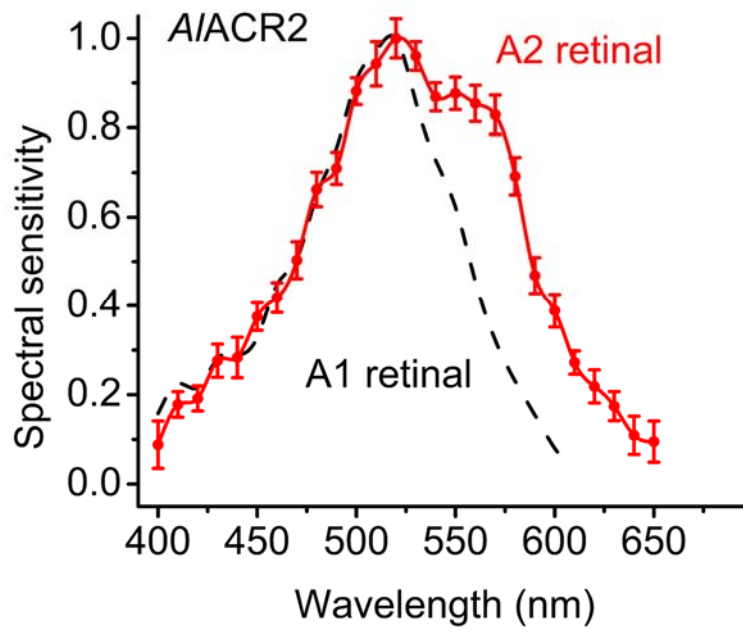

**Fig. S11.** The action spectrum of photocurrents generated by *A/ACR2* reconstituted with A1 (black) and A2 (red) retinal.

**Table S1.** A list of analyzed genomes.

|     | Organism name                                                                | Genome assembly number              | URL                                                                                                                                                                       | Principal investigator /Submitter           | Status                 |
|-----|------------------------------------------------------------------------------|-------------------------------------|---------------------------------------------------------------------------------------------------------------------------------------------------------------------------|---------------------------------------------|------------------------|
| 1.  | <i>Aplanochytrium kerguelense</i> PBS07                                      | 1.0                                 | <a href="https://phycocosm.jgi.doe.gov/Aplke1/Aplke1.home.html">https://phycocosm.jgi.doe.gov/Aplke1/Aplke1.home.html</a>                                                 | Jackie Collier                              | Complete, annotated    |
| 2.  | <i>Aurantiochytrium acetophilum</i> HS399                                    | ASM433257v1                         | <a href="https://www.ncbi.nlm.nih.gov/genome/79056?genome_assembly_id=492055">https://www.ncbi.nlm.nih.gov/genome/79056?genome_assembly_id=492055</a>                     | Heliae Development                          | Shotgun                |
| 3.  | <i>Aurantiochytrium limacinum</i> ATCC MYA-1381                              | Not defined                         | <a href="https://phycocosm.jgi.doe.gov/Aurli1/Aurli1.home.html">https://phycocosm.jgi.doe.gov/Aurli1/Aurli1.home.html</a>                                                 | Jackie Collier                              | Complete, annotated    |
| 4.  | <i>Aurantiochytrium</i> sp. KH105                                            | Auran_KH105_1.0                     | <a href="https://www.ncbi.nlm.nih.gov/genome/41915?genome_assembly_id=374513">https://www.ncbi.nlm.nih.gov/genome/41915?genome_assembly_id=374513</a>                     | Okinawa Institute of Science and Technology | Shotgun                |
| 5.  |                                                                              | Not defined                         | <a href="https://marinegenomics.oist.jp/aurantiochytrium_sp_kh105/viewer?project_id=56">https://marinegenomics.oist.jp/aurantiochytrium_sp_kh105/viewer?project_id=56</a> | Okinawa Institute of Science and Technology | Not defined, annotated |
| 6.  | <i>Aurantiochytrium</i> sp. T66                                              | ASM146250v1                         | <a href="https://www.ncbi.nlm.nih.gov/genome/41915?genome_assembly_id=259575">https://www.ncbi.nlm.nih.gov/genome/41915?genome_assembly_id=259575</a>                     | ThraustoEng                                 | Shotgun                |
| 7.  | <i>Hondaea fermentalgiana</i> FCC1311 ( <i>Aurantiochytrium</i> sp. FCC1311) | <i>Aurantiochytrium</i> _FCC1311_v1 | <a href="https://www.ncbi.nlm.nih.gov/genome/72081?genome_assembly_id=400191">https://www.ncbi.nlm.nih.gov/genome/72081?genome_assembly_id=400191</a>                     | Fermentalg                                  | Shotgun                |
| 8.  | <i>Schizochytrium aggregatum</i> ATCC 28209                                  | Not defined                         | <a href="https://mycocosm.jgi.doe.gov/Schag1/Schag1.home.html">https://mycocosm.jgi.doe.gov/Schag1/Schag1.home.html</a>                                                   | Jackie Collier                              | Complete, annotated    |
| 9.  | <i>Schizochytrium</i> sp. CCTCC M209059                                      | ASM81894v1                          | <a href="https://www.ncbi.nlm.nih.gov/genome/35766?genome_assembly_id=217282">https://www.ncbi.nlm.nih.gov/genome/35766?genome_assembly_id=217282</a>                     | Nanjing Tech University                     | Shotgun                |
| 10. | <i>Schizochytrium</i> sp. TIO01                                              | ASM476469v1                         | <a href="https://www.ncbi.nlm.nih.gov/genome/35766?genome_assembly_id=491898">https://www.ncbi.nlm.nih.gov/genome/35766?genome_assembly_id=491898</a>                     | Third Institute of Oceanography             | Shotgun                |
| 11. | <i>Thraustochytrium aureum</i> ATCC 34304                                    | Tau_assembly01                      | <a href="https://www.ncbi.nlm.nih.gov/genome/88990?genome_assembly_id=889105">https://www.ncbi.nlm.nih.gov/genome/88990?genome_assembly_id=889105</a>                     | Kyushu University                           | Shotgun                |
| 12. | <i>Thraustochytrium</i> sp. ATCC 26185                                       | ASM215423v1                         | <a href="https://www.ncbi.nlm.nih.gov/genome/54615?genome_assembly_id=318815">https://www.ncbi.nlm.nih.gov/genome/54615?genome_assembly_id=318815</a>                     | University of Saskatchewan                  | Shotgun                |
| 13. | <i>Parietichytrium</i> sp. I65-24A                                           | Pari_assembly01                     | <a href="https://www.ncbi.nlm.nih.gov/genome/88991?genome_assembly_id=889106">https://www.ncbi.nlm.nih.gov/genome/88991?genome_assembly_id=889106</a>                     | Kyushu University                           | Shotgun                |
| 14. | <i>Phaeocystis antarctica</i> CCMP1374                                       | 2.2                                 | <a href="https://phycocosm.jgi.doe.gov/Phaant1/Phaant1.home.html">https://phycocosm.jgi.doe.gov/Phaant1/Phaant1.home.html</a>                                             | Kevin Arrigo                                | Not defined, annotated |
| 15. | <i>Phaeocystis globosa</i> Pg-G                                              | 2.3                                 | <a href="https://mycocosm.jgi.doe.gov/Phaglo1/Phaglo1.home.html">https://mycocosm.jgi.doe.gov/Phaglo1/Phaglo1.home.html</a>                                               | Andy Allen                                  | Not defined, annotated |

**Table S2.** A list of labyrinthulea ACR homologs (in bold – synthesized and tested by patch clamp in this study)

|     | GenBank accession number | Abbreviated protein name | Source organism                                                              | JGI gene model name or WGS/MMETSP sequence name | $\lambda_{\max}$ (nm) |
|-----|--------------------------|--------------------------|------------------------------------------------------------------------------|-------------------------------------------------|-----------------------|
| 1.  |                          | <i>Aa</i> ACR1           | <i>Aurantiochytrium acetophilum</i> HS399                                    | QDJC01000532                                    |                       |
| 2.  |                          | <i>Aa</i> ACR2           |                                                                              | QDJC01003161                                    |                       |
| 3.  |                          | <i>Aa</i> ACR3           |                                                                              | QDJC01000037                                    |                       |
| 4.  | <b>MT002467</b>          | <b><i>A</i>ACR1</b>      | <i>Aurantiochytrium limacinum</i> ATCC MYA-1381                              | <b>fgenes1_pg.12 # 284</b>                      | <b>590</b>            |
| 5.  | <b>MT002473</b>          | <b><i>A</i>ACR2</b>      |                                                                              | <b>fgenes1_pg.12 # 285</b>                      | <b>545</b>            |
| 6.  | <b>MT002476</b>          | <b><i>A</i>ACR3</b>      |                                                                              | <b>fgenes1_pg.1 # 498</b>                       | <b>485</b>            |
| 7.  |                          | <i>As</i> ACR1           | <i>Aplanochytrium stocchinoi</i> *                                           | DN5182_c0_g3_i1.p1                              |                       |
| 8.  |                          | <i>As</i> ACR2           |                                                                              | DN9014_c0_g1_i1.p1, DN12229_c0_g1_i1.p1         |                       |
| 9.  | <b>MT002468</b>          | <b><i>A</i>1ACR1a</b>    | <i>Aurantiochytrium</i> sp. KH105                                            | <b>BGKB01000037</b>                             | <b>610</b>            |
| 10. |                          | <i>A</i> 1ACR1b          |                                                                              | BGKB01000105                                    |                       |
| 11. |                          | <i>A</i> 1ACR2a          |                                                                              | BGKB01000037†                                   |                       |
| 12. |                          | <i>A</i> 1ACR2b          |                                                                              | BGKB01000105†                                   |                       |
| 13. |                          | <i>A</i> 1ACR3a          |                                                                              | BGKB01000099                                    |                       |
| 14. |                          | <i>A</i> 1ACR3b          |                                                                              | BGKB01000102                                    |                       |
| 15. |                          | <i>A</i> 2ACR1           |                                                                              | <i>Aurantiochytrium</i> sp. T66                 | LNGJ01004228          |
| 16. |                          | <i>A</i> 2ACR2           | LNGJ01004228†                                                                |                                                 |                       |
| 17. |                          | <i>A</i> 2ACR3           | LNGJ01002066                                                                 |                                                 |                       |
| 18. | <b>MT002469</b>          | <b><i>Hf</i>ACR1</b>     | <i>Hondaea fermentalgiana</i> FCC1311 ( <i>Aurantiochytrium</i> sp. FCC1311) | <b>BEYU01000006</b>                             | <b>610</b>            |
| 19. |                          | <i>Hf</i> ACR2           |                                                                              | BEYU01000006†                                   |                       |
| 20. |                          | <i>Hf</i> ACR3           |                                                                              | BEYU01000001                                    |                       |
| 21. |                          | <i>P</i> 1ACR1           | <i>Parietichytrium</i> sp. I65-24A                                           | BLSF01000016                                    |                       |
| 22. |                          | <i>P</i> 1ACR2           |                                                                              | BLSF01000022                                    |                       |
| 23. |                          | <i>P</i> 1ACR3           |                                                                              | BLSF01000101                                    |                       |
| 24. | <b>MT002463</b>          | <b><i>Sa</i>ACR2</b>     | <i>Schizochytrium aggregatum</i> ATCC 28209                                  | <b>fgenes1_pg.3 # 476</b>                       | <b>520</b>            |
| 25. |                          | <i>Sa</i> ACR3           |                                                                              | fgenes1_pg.3 # 475                              |                       |
| 26. |                          | <i>S</i> 1ACR1           | <i>Schizochytrium</i> sp. CCTCC M209059                                      | JTFK01000019                                    |                       |
| 27. |                          | <i>S</i> 1ACR2           |                                                                              | JTFK01000019†                                   |                       |
| 28. |                          | <i>S</i> 1ACR3           |                                                                              | JTFK01000324                                    |                       |
| 29. |                          | <i>S</i> 2ACR1           | <i>Schizochytrium</i> sp. TIO01                                              | SMSO01000032                                    |                       |
| 30. |                          | <i>S</i> 2ACR2           |                                                                              | SMSO01000032†                                   |                       |
| 31. |                          | <i>S</i> 2ACR3           |                                                                              | SMSO01000014                                    |                       |
| 32. |                          | <i>Ta</i> ACR1           | <i>Thraustochytrium aureum</i> ATCC 34304                                    | BLSG01000269                                    |                       |
| 33. |                          | <i>Ta</i> ACR2           |                                                                              | BLSG01000269†                                   |                       |
| 34. |                          | <i>Ta</i> ACR3           |                                                                              | BLSG01000370                                    |                       |
| 35. | <b>MT002470</b>          | <b><i>T</i>1ACR1</b>     | <i>Thraustochytrium</i> sp. ATCC 26185                                       | <b>MUFY01006470</b>                             | <b>590</b>            |
| 36. |                          | <i>T</i> 1ACR2           |                                                                              | MUFY01006469                                    |                       |
| 37. |                          | <i>T</i> 1ACR3           |                                                                              | MUFY01009420                                    |                       |

\*This species was analyzed by Rozenberg et al. (16).

†These proteins are encoded by the complement strand of the WGS sequence.



**Table S3.** A list of haptophyte ACR homologs tested in this study

|    | GenBank accession number | Abbreviated protein name | Source organism                           | JGI gene model name                                           | $\lambda_{\max}$ (nm) |
|----|--------------------------|--------------------------|-------------------------------------------|---------------------------------------------------------------|-----------------------|
| 1. | MT002471                 | <i>Pa</i> ACR1           | <i>Phaeocystis antarctica</i><br>CCMP1374 | Phant.0066s0015.1                                             | 520                   |
| 2. | MT002474                 | <i>Pa</i> ACR2           |                                           | Phant.0011s0329.1                                             | 510                   |
| 3. | MT002477                 | <i>Pa</i> ACR3           |                                           | Phant.0016s0461.1,<br>Phant.0016s0462.1,<br>Phant.0016s0464.1 | 480                   |
| 4. | MT002464                 | <i>Pa</i> ACR4           |                                           | Phant.0060s0074.1                                             | 480                   |
| 5. | MT002465                 | <i>Pa</i> ACR5           |                                           | Phant.0086s0086.1                                             | N.A.                  |
| 6. | MT002466                 | <i>Pa</i> ACR6           |                                           | Phant.0001s0932.1                                             | N.A.                  |
| 7. | MT002472                 | <i>Pg</i> ACR1           | <i>Phaeocystis globosa</i> Pg-G           | Phglo.0395s0005.1                                             | 485                   |
| 8. | MT002475                 | <i>Pg</i> ACR2           |                                           | Phglo.0149s0014.1                                             | 485                   |
| 9. | MT002478                 | <i>Pg</i> ACR3           |                                           | Phglo.0128s0040.1                                             | N.A.                  |

## Legend for Dataset S1

**Dataset S1.** GenBank accession numbers, abbreviated protein names and source organism names for previously known channelrhodopsins included in the tree shown in Fig. 1A in the main text.
